# Supplementary material for: Pathogen genomic surveillance status among lower resource settings in Asia
Source: PubMed Central journal article supplement — Nat Microbiol. 2024 Sep 24;9(10):2738–47. doi: 10.1038/s41564-024-01809-4 (PMC11445059; doi:10.1038/s41564-024-01809-4), 2024-09-24
Supplement: 41564_2024_1809_MOESM2_ESM.pdf [file 41564_2024_1809_MOESM2_ESM.pdf]

## **INVENTORY OF SUPPLIMENTARY INFORMATION**

**Supplementary Table 1.** Asia Pathogen Genomics Initiative (Asia PGI) consortium list. All authors below contributed equally. Author names are ordered in alphabetical order first by country, then by organization and finally by last name.

**Supplementary Table 2:** List of participating countries and institutions

**Supplementary Table 3:** Reference Tools for System-wide Pathogen Genomics Assessment Framework Development

**Supplementary Table 4:** System-wide Pathogen Genomics Assessment Tool

**Supplementary Table 5:** Binary indicators used for calculating country summary scores.

**Supplementary Table 1.** Asia Pathogen Genomics Initiative (Asia PGI) consortium list. All authors below contributed equally. Author names are ordered in alphabetical order first by country, then by organization and finally by last name.

| <b>No.</b> | <b>Name</b>                      | <b>Organization</b>                                                          | <b>Country</b> |
|------------|----------------------------------|------------------------------------------------------------------------------|----------------|
| 1          | Manjur Hossain <b>Khan</b>       | Institute of Epidemiology, Disease Control and Research (IEDCR)              | Bangladesh     |
| 2          | Hassan <b>Afrad</b>              | International Centre for Diarrhoeal Disease Research (icddr,b)               | Bangladesh     |
| 3          | Dinesh <b>Mondal</b>             | International Centre for Diarrhoeal Disease Research (icddr,b)               | Bangladesh     |
| 4          | Mustafizur <b>Rahman</b>         | International Centre for Diarrhoeal Disease Research (icddr,b)               | Bangladesh     |
| 5          | Nor Azian Binti <b>Hj Hafneh</b> | Department of Laboratory Services, Ministry of Health                        | Brunei         |
| 6          | Nur Amirah <b>Ibrahim</b>        | Department of Laboratory Services, Ministry of Health                        | Brunei         |
| 7          | Sokelaph <b>Cheng</b>            | Institut Pasteur du Cambodge (IPC)                                           | Cambodia       |
| 8          | Vireak <b>Heang</b>              | Institut Pasteur du Cambodge (IPC)                                           | Cambodia       |
| 9          | Nimol <b>Khim</b>                | Institut Pasteur du Cambodge (IPC)                                           | Cambodia       |
| 10         | Koen <b>Vandelannoote</b>        | Institut Pasteur du Cambodge (IPC)                                           | Cambodia       |
| 11         | Sophana <b>Chea</b>              | International Center of Excellence in Research (ICER)                        | Cambodia       |
| 12         | Sreyngim <b>Lay</b>              | International Center of Excellence in Research (ICER)                        | Cambodia       |
| 13         | Lyhourng <b>Long</b>             | International Center of Excellence in Research (ICER)                        | Cambodia       |
| 14         | Mengheng <b>Oum</b>              | International Center of Excellence in Research (ICER)                        | Cambodia       |
| 15         | Christina <b>Yek</b>             | International Center of Excellence in Research (ICER)                        | Cambodia       |
| 16         | Chanthap <b>Lon</b>              | International Center of Excellence in Research (ICER)                        | Cambodia       |
| 17         | Chau <b>Darapheak</b>            | National Institute of Public Health                                          | Cambodia       |
| 18         | Prum <b>Sitha</b>                | National Institute of Public Health                                          | Cambodia       |
| 19         | Chhe <b>Visal</b>                | National Institute of Public Health                                          | Cambodia       |
| 20         | Ines <b>Atmosukarto</b>          | Biomedical and Genome Science Initiative (BGSi)                              | Indonesia      |
| 21         | Ririn <b>Ramadhany</b>           | Biomedical and Genome Science Initiative (BGSi)                              | Indonesia      |
| 22         | Kindi <b>Adam</b>                | Health Policy Agency, Ministry of Health                                     | Indonesia      |
| 23         | Hana Apsari <b>Pawestri</b>      | Health Policy Agency, Ministry of Health                                     | Indonesia      |
| 24         | I Gede <b>Wirabrata</b>          | Health Policy Agency, Ministry of Health                                     | Indonesia      |
| 25         | Hana <b>Krismawati</b>           | Strategic Delivery team for the Minister of Health                           | Indonesia      |
| 26         | Elizabeth <b>Ashley</b>          | Lao-Oxford University-Mahosot Hospital-Wellcome Trust Research Unit (LOMWRU) | Laos           |
| 27         | Audrey <b>Dubot-Pérés</b>        | Lao-Oxford University-Mahosot Hospital-Wellcome Trust Research Unit (LOMWRU) | Laos           |
| 28         | Manivanh <b>Vongsouvath</b>      | Lao-Oxford University-Mahosot Hospital-Wellcome Trust Research Unit (LOMWRU) | Laos           |
| 29         | Bouaphan <b>Khamphongphone</b>   | National Centre for Laboratory and Epidemiology (NCLE)                       | Laos           |

|    |                                        |                                                                                        |          |
|----|----------------------------------------|----------------------------------------------------------------------------------------|----------|
| 30 | <b>Boualay Norchaleun</b>              | National Centre for Laboratory and Epidemiology (NCLE)                                 | Laos     |
| 31 | <b>Virasack Somoulay</b>               | National Centre for Laboratory and Epidemiology (NCLE)                                 | Laos     |
| 32 | <b>Rahman Jamal</b>                    | Universiti Kebangsaan Malaysia (UKM)                                                   | Malaysia |
| 33 | <b>Mohd Istiaq Anasir</b>              | Institute for Medical Research (IMR)                                                   | Malaysia |
| 34 | <b>Khayri Azizi Kamel</b>              | Institute for Medical Research (IMR)                                                   | Malaysia |
| 35 | <b>Norhidayah Kamarudin</b>            | International Islamic University Malaysia (IIUM)                                       | Malaysia |
| 36 | <b>Mohd Noor Mat Isa</b>               | Malaysia Genome and Vaccine Institute (MGVI)                                           | Malaysia |
| 37 | <b>Yusuf Muhammad Noor</b>             | Malaysia Genome and Vaccine Institute (MGVI)                                           | Malaysia |
| 38 | <b>Nor Azila Muhammad Azami</b>        | Universiti Kebangsaan Malaysia                                                         | Malaysia |
| 39 | <b>Eric Chong Tzyy Jiann</b>           | Universiti Malaysia Sabah (UMS)                                                        | Malaysia |
| 40 | <b>Lee Ping Chin</b>                   | Universiti Malaysia Sabah (UMS)                                                        | Malaysia |
| 41 | <b>Syafinaz Amin-Nordin</b>            | Universiti Putra Malaysia (UPM) /Hospital Sultan Abdul Aziz Shah                       | Malaysia |
| 42 | <b>Narcisse Mary Sither Joseph</b>     | Universiti Putra Malaysia (UPM)                                                        | Malaysia |
| 43 | <b>Chan Yean Yean</b>                  | Universiti Sains Malaysia (USM)                                                        | Malaysia |
| 44 | <b>Rosline Hassan</b>                  | Universiti Sains Malaysia (USM)                                                        | Malaysia |
| 45 | <b>Nurfadhlina Musa</b>                | Universiti Sains Malaysia (USM)                                                        | Malaysia |
| 46 | <b>Wardah Yusof</b>                    | Universiti Sains Malaysia (USM)                                                        | Malaysia |
| 47 | <b>Sazaly Abu Bakar</b>                | University Malaya (UM)                                                                 | Malaysia |
| 48 | <b>Chan Yoke Fun</b>                   | University Malaya (UM)                                                                 | Malaysia |
| 49 | <b>Tan Kim Kee</b>                     | University Malaya (UM)                                                                 | Malaysia |
| 50 | <b>David Perera</b>                    | University Malaysia Sarawak (UNIMAS)                                                   | Malaysia |
| 51 | <b>Mohd Nur Fakhruzzaman Noorizhab</b> | University Teknologi MARA (UiTM)                                                       | Malaysia |
| 52 | <b>Mohd Zaki Salleh</b>                | University Teknologi MARA (UiTM)                                                       | Malaysia |
| 53 | <b>Teh Lay Kek</b>                     | University Teknologi MARA (UiTM)                                                       | Malaysia |
| 54 | <b>Wah Wah Aung</b>                    | Advanced Molecular Research Centre, Department of Medical Research, Ministry of Health | Myanmar  |
| 55 | <b>Myat Htut Nyunt</b>                 | Advanced Molecular Research Centre, Department of Medical Research, Ministry of Health | Myanmar  |
| 56 | <b>Moe Myat Aye</b>                    | National Health Laboratory, Department of Medical Service, Ministry of Health          | Myanmar  |
| 57 | <b>May Pyone Kyaw</b>                  | University of Medicine 1 Yangon                                                        | Myanmar  |
| 58 | <b>Nirajan Bhusal</b>                  | World Health Organisation (WHO) country office for Nepal, Nepal                        | Nepal    |
| 59 | <b>Allison (Eugenio) Gocotano</b>      | World Health Organisation (WHO) country office for Nepal, Nepal                        | Nepal    |
| 60 | <b>Junaid Iqbal</b>                    | Aga Khan University                                                                    | Pakistan |
| 61 | <b>Furqan Kabir</b>                    | Aga Khan University                                                                    | Pakistan |

|    |                                          |                                                                |             |
|----|------------------------------------------|----------------------------------------------------------------|-------------|
| 62 | <b>Waqasuddin Khan</b>                   | Aga Khan University                                            | Pakistan    |
| 63 | <b>Dodge Lim</b>                         | National TB Reference Laboratory/RITM                          | Philippines |
| 64 | <b>Ramon Basilio</b>                     | Research Institute for Tropical Medicine (RITM)                | Philippines |
| 65 | <b>Criselda Bautista</b>                 | Research Institute for Tropical Medicine (RITM)                | Philippines |
| 66 | <b>Joseph Bonifacio</b>                  | Research Institute for Tropical Medicine (RITM)                | Philippines |
| 67 | <b>Jennifer Luchavez</b>                 | Research Institute for Tropical Medicine (RITM)                | Philippines |
| 68 | <b>Mayan Lumandas</b>                    | Research Institute for Tropical Medicine (RITM)                | Philippines |
| 69 | <b>Amado Ona Tandoc III</b>              | Research Institute for Tropical Medicine (RITM)                | Philippines |
| 70 | <b>Angelica Tujan</b>                    | Research Institute for Tropical Medicine (RITM)                | Philippines |
| 71 | <b>Marc Edsel Ayes</b>                   | University of the Philippines, Philippine Genome Center        | Philippines |
| 72 | <b>Francis Tablizo</b>                   | University of the Philippines, Philippine Genome Center        | Philippines |
| 73 | <b>Eva Maria Cutiongco-De La Paz</b>     | University of the Philippines, Philippine Genome Center        | Philippines |
| 74 | <b>Benedict Maralit</b>                  | University of the Philippines, Philippine Genome Center        | Philippines |
| 75 | <b>Joel Hassan G. Tolentino</b>          | University of the Philippines, Philippine Genome Center        | Philippines |
| 76 | <b>Victor Marco Emmanuel N. Ferriols</b> | University of the Philippines, Philippine Genome Center        | Philippines |
| 77 | <b>Elcid Aaron R Pangilinan</b>          | University of the Philippines, Philippine Genome Center        | Philippines |
| 78 | <b>Renato Jacinto Q Mantaring</b>        | University of the Philippines, Philippine Genome Center        | Philippines |
| 79 | <b>Dinuka Ariyaratne</b>                 | University of Sri Jayewardenepura                              | Sri Lanka   |
| 80 | <b>Tibutius T. P. Jayadas</b>            | University of Sri Jayewardenepura                              | Sri Lanka   |
| 81 | <b>Waritta Sawaengdee</b>                | Medical Life Science Institute, Department of Medical Sciences | Thailand    |
| 82 | <b>Sukanya Wattanapokayakit</b>          | Medical Life Science Institute, Department of Medical Sciences | Thailand    |
| 83 | <b>Hoang Vu Mai Phuong</b>               | National Institute of Hygiene and Epidemiology (NIHE)          | Vietnam     |
| 84 | <b>Ung Thi Hong Trang</b>                | National Institute of Hygiene and Epidemiology (NIHE)          | Vietnam     |
| 85 | <b>H Rogier Van Doorn</b>                | Oxford University Clinical Research Unit (OUCRU) Hanoi         | Vietnam     |
| 86 | <b>Nguyen To Anh</b>                     | Oxford University Clinical Research Unit (OUCRU) HCMC          | Vietnam     |
| 87 | <b>Quang Duy Pham</b>                    | Pasteur Institute, Ho Chi Minh City                            | Vietnam     |
| 88 | <b>Huynh Kim Mai</b>                     | Pasteur Institute, Nha Trang                                   | Vietnam     |
| 89 | <b>Nguyen Bao Trieu</b>                  | Pasteur Institute, Nha Trang                                   | Vietnam     |

**Supplementary Table 2: List of participating countries and institutions**

| Country                               | Institution                                                                                            | Percentage of total SARS-CoV-2 sequences submitted to GISAID (Jan – Dec 2022) |
|---------------------------------------|--------------------------------------------------------------------------------------------------------|-------------------------------------------------------------------------------|
| Bangladesh                            | 1. Child Health Research Foundation (CHRF)                                                             | 71%                                                                           |
|                                       | 2. Institute of Epidemiology, Disease Control and Research (IEDCR, Bangladesh)                         |                                                                               |
|                                       | 3. International Centre for Diarrhoeal Disease Research (icddr.b)                                      |                                                                               |
| Brunei                                | 4. Department of Laboratory Services, Ministry of Health                                               | 100%                                                                          |
| Cambodia                              | 5. Institute Pasteur Cambodia (IPC)                                                                    | 100%                                                                          |
|                                       | 6. International Center of Excellence in Research (ICER), National Institutes of Health                |                                                                               |
|                                       | 7. National Institute of Public Health (NIPH)                                                          |                                                                               |
| Indonesia                             | 8. Health Development Policy Agency, Ministry of Health                                                | 82%*                                                                          |
|                                       | 9. Biomedical and Genome Science Initiative (BGSi), Ministry of Health                                 |                                                                               |
| Lao PDR                               | 10. Lao-Oxford University-Mahosot Hospital-Wellcome Trust Research Unit (LOMWRU)                       | 100%                                                                          |
|                                       | 11. National Centre for Laboratory and Epidemiology (NCLE)                                             |                                                                               |
| Myanmar                               | 12. Department of Medical Research, Ministry of Health                                                 | 2% **                                                                         |
|                                       | 13. National Health Laboratory (NHL) Department of Medical Service, Ministry of Health                 |                                                                               |
| Malaysia                              | 14. Malaysia Genome and Vaccine Institute (MGVI), National Institutes of Biotechnology Malaysia (NIBM) | 84%                                                                           |
|                                       | 15. Institute for Medical Research (IMR), Ministry of Health Malaysia                                  |                                                                               |
|                                       | 16. Hospital Canselor Tuanku Muhriz UKM (HCTM)                                                         |                                                                               |
|                                       | 17. Universiti Kebangsaan Malaysia (UKM)                                                               |                                                                               |
|                                       | 18. Universiti Malaya (UM)                                                                             |                                                                               |
|                                       | 19. Tropical Infectious Diseases Research and Education Centre (TIDREC), University Malaya             |                                                                               |
|                                       | 20. Universiti Teknologi MARA (UiTM)                                                                   |                                                                               |
|                                       | 21. Hospital Sultan Abdul Aziz Shah (HSAAS)                                                            |                                                                               |
|                                       | 22. Universiti Putra Malaysia (UPM)                                                                    |                                                                               |
|                                       | 23. Universiti Sains Malaysia (USM)                                                                    |                                                                               |
|                                       | 24. International Islamic University Malaysia (IIUM)                                                   |                                                                               |
|                                       | 25. Universiti Malaysia Sarawak (UNIMAS)                                                               |                                                                               |
|                                       | 26. Universiti Malaysia Sabah (UMS)                                                                    |                                                                               |
| 27. National Public Health Laboratory |                                                                                                        |                                                                               |
| Nepal                                 | 28. World Health Organisation (WHO) country office for Nepal, Nepal                                    | 68%                                                                           |
|                                       | 29. National Public Health Laboratory                                                                  |                                                                               |
| Pakistan                              | 30. National Institute of Health (NIH)                                                                 | 85%                                                                           |
|                                       | 31. Aga Khan University (AKU, Pakistan)                                                                |                                                                               |
| Philippines                           | 32. Research Institute for Tropical Medicine (RITM)                                                    | 100%                                                                          |
|                                       | 33. Philippine Genome Center (PGC), University of the Philippines                                      |                                                                               |
| Sri Lanka                             | 34. Ministry of Health                                                                                 | 92%                                                                           |
|                                       | 35. University of Sri Jayewardenepura                                                                  |                                                                               |
| Thailand                              | 36. Department of Medical Sciences, Ministry of Health                                                 | 86%                                                                           |
|                                       | 37. Mahidol University                                                                                 |                                                                               |
|                                       | 38. COVID-19 Network Investigations Alliance                                                           |                                                                               |
| Vietnam                               | 39. National Institute of Hygiene and Epidemiology                                                     | 73%                                                                           |
|                                       | 40. Oxford University of Clinical Research Unit                                                        |                                                                               |
|                                       | 41. Institute Pasteur, Ho Chi Minh City (IP HCMC)                                                      |                                                                               |
|                                       | 42. Institute Pasteur, Nha Trang (IP Nha Trang)                                                        |                                                                               |

\*Indonesia: Ministry of Health and BGSi have oversight over all public sector genomic surveillance

\*\*Myanmar: Asia PGI partnership is with Ministry of Health. However, 98% of SARS-CoV-2 sequences for 2022 were submitted to GISAID by the Defence Services Medical Research Center (DSMRC) under the Ministry of Defence.

**Supplementary Table 3: Reference Tools for System-wide Pathogen Genomics Assessment Framework Development**

| No. | Title                                                                                                                                                                                                                                                                                                                                                                                         |
|-----|-----------------------------------------------------------------------------------------------------------------------------------------------------------------------------------------------------------------------------------------------------------------------------------------------------------------------------------------------------------------------------------------------|
| 1   | Laboratory Mapping Tool. Food and Agriculture Organization; 2014.                                                                                                                                                                                                                                                                                                                             |
| 2   | Regulatory System Profiling Instrument (RSPI). Centre of Regulatory Excellence (CoRE), Duke-NUS Medical School.                                                                                                                                                                                                                                                                               |
| 3   | Laboratory Sequencing Capacity Needs Assessment. Centers for Disease Control and Prevention (CDC).                                                                                                                                                                                                                                                                                            |
| 4   | Sparkes S., Durán A., Kutzin J. A system-wide approach to analysing efficiency across health programmes. Geneva: World Health Organization; 2017. (Health Financing Diagnostics & Guidance No 2) Licence: CCBY-NC-SA 3.0 IGO; <a href="http://apps.who.int/iris/bitstream/10665/254644/1/9789241511964-eng.pdf">http://apps.who.int/iris/bitstream/10665/254644/1/9789241511964-eng.pdf</a> . |
| 5   | Global Influenza Surveillance and Response System - GISRS 2019 Interim Guidance. World Health Organization; 2019.                                                                                                                                                                                                                                                                             |
| 6   | GISRS: Operational considerations to expedite genomic sequencing component of GISRS surveillance of SARS-CoV-2. World Health Organization; 2021.                                                                                                                                                                                                                                              |
| 7   | Genomic sequencing of SARS-CoV-2: a guide to implementation for maximum impact on public health. World Health Organization; 2021.                                                                                                                                                                                                                                                             |
| 8   | SARS-CoV-2 genomic sequencing for public health goals. World Health Organization; 2021.                                                                                                                                                                                                                                                                                                       |
| 9   | Whole genomic sequencing for foodborne disease surveillance. World Health Organization; 2018.                                                                                                                                                                                                                                                                                                 |
| 10  | Global Genomic Surveillance Strategy 2022 - 2032 DRAFT. World Health Organization; 2021.                                                                                                                                                                                                                                                                                                      |
| 11  | GLASS Whole Genome Sequencing for surveillance of antimicrobial resistance. World Health Organization; 2020.                                                                                                                                                                                                                                                                                  |
| 12  | Guidance for the surveillance of drug resistance in tuberculosis; sixth edition. World Health Organization; 2020.                                                                                                                                                                                                                                                                             |
| 13  | FIND Next Generation Sequencing (NGS) Global Capacity Mapping for SARS-CoV-2. 2021. ( <a href="https://www.finddx.org/covid-19/covid-19-genomic-surveillance/covid-19-next-generation-sequencing-global-capacity-mapping/">https://www.finddx.org/covid-19/covid-19-genomic-surveillance/covid-19-next-generation-sequencing-global-capacity-mapping/</a> )                                   |
| 14  | New Variant Assessment Programme (NVAP). UK Health Security Agency; 2021.                                                                                                                                                                                                                                                                                                                     |
| 15  | Pan African Bioinformatics Network for H3Africa. H3AbioNet. ( <a href="https://www.h3abionet.org/">https://www.h3abionet.org/</a> )                                                                                                                                                                                                                                                           |
| 16  | Human, Heredity and Health in Africa. H3Africa consortium. ( <a href="https://h3africa.org/">https://h3africa.org/</a> )                                                                                                                                                                                                                                                                      |
| 17  | Public Health Alliance for Genomic Epidemiology. PHA4GE. ( <a href="https://h3africa.org/index.php/consortium/consortium-documents/">https://h3africa.org/index.php/consortium/consortium-documents/</a> )                                                                                                                                                                                    |
| 18  | Narayanasamy S, Markina V, Thorogood A, Blazkova A, Shabani M, Knoppers BM, Prainsack B and Koesters R (2020) Genomic Sequencing Capacity, Data Retention, and Personal Access to Raw Data in Europe. <i>Front. Genet.</i> 11:303. doi: 10.3389/fgene.2020.00303                                                                                                                              |
| 19  | Black, A., MacCannell, D.R., Sibley, T.R. et al. Ten recommendations for supporting open pathogen genomic analysis in public health. <i>Nat Med</i> 26, 832–841 (2020). <a href="https://doi.org/10.1038/s41591-020-0935-z">https://doi.org/10.1038/s41591-020-0935-z</a>                                                                                                                     |
| 20  | Phillips KA, Douglas MP, Wordsworth S, et al. Availability and funding of clinical genomic sequencing globally. <i>BMJ Global Health</i> 2021;6:e004415. doi:10.1136/bmjgh-2020-004415                                                                                                                                                                                                        |
| 21  | COVID-19 genomics surveillance regional network. Pan American Health Organization. ( <a href="https://www.paho.org/en/topics/influenza-sars-cov-2-rsv-and-other-respiratory-viruses/covid-19-genomic-surveillance">https://www.paho.org/en/topics/influenza-sars-cov-2-rsv-and-other-respiratory-viruses/covid-19-genomic-surveillance</a> )                                                  |
| 22  | WHO Laboratory Assessment Tool and System Questionnaire. 2012. World Health Organization/GOARN. <a href="https://www.who.int/publications/i/item/WHO-HSE-GCR-LYO-2012.2">https://www.who.int/publications/i/item/WHO-HSE-GCR-LYO-2012.2</a>                                                                                                                                                   |
| 23  | Next generation sequencing of influenza viruses: General information for national influenza centers. World Health Organization; 2019.                                                                                                                                                                                                                                                         |
| 24  | The use of next-generation sequencing technologies for the detection of mutations associated with drug resistance in Mycobacterium tuberculosis complex: technical guide. World Health Organization; 2018.                                                                                                                                                                                    |
| 25  | Regulating the unknown: A guide to regulating genomics for health policy makers (policy brief). European Observatory on Health & Policies, World Health Organization; 2020.                                                                                                                                                                                                                   |

**Supplementary Table 4:** System-wide Pathogen Genomics Assessment Tool (*see preceding pages*).

## Landscape Assessment Tool

### Pathogen Surveillance and Genomic Sequencing in Asia

| Participant Information – Responder 1 |                           |  |
|---------------------------------------|---------------------------|--|
| a.                                    | Name/Job title/Email      |  |
| b.                                    | Country                   |  |
| c.                                    | Organisation              |  |
| d.                                    | Date of survey completion |  |

| Participant Information – Responder 2 |                           |  |
|---------------------------------------|---------------------------|--|
| a.                                    | Name/Job title/Email      |  |
| b.                                    | Country                   |  |
| c.                                    | Organisation              |  |
| d.                                    | Date of survey completion |  |

| Participant Information – Responder 3 <i>(add additional responder information tables as needed)</i> |                           |  |
|------------------------------------------------------------------------------------------------------|---------------------------|--|
| a.                                                                                                   | Name/Job title/Email      |  |
| b.                                                                                                   | Country                   |  |
| c.                                                                                                   | Organisation              |  |
| d.                                                                                                   | Date of survey completion |  |

| Section 1: Enabling Environment |                                                                                                                                                                                |                                                                                                                                                                                                                                                                                                                                                                                                                                                                                                                                                             |        |                |        |  |         |  |                      |  |              |  |
|---------------------------------|--------------------------------------------------------------------------------------------------------------------------------------------------------------------------------|-------------------------------------------------------------------------------------------------------------------------------------------------------------------------------------------------------------------------------------------------------------------------------------------------------------------------------------------------------------------------------------------------------------------------------------------------------------------------------------------------------------------------------------------------------------|--------|----------------|--------|--|---------|--|----------------------|--|--------------|--|
| Part 1.1: Status                |                                                                                                                                                                                |                                                                                                                                                                                                                                                                                                                                                                                                                                                                                                                                                             |        |                |        |  |         |  |                      |  |              |  |
| 1.1.1                           | Does Next Generation Sequencing (NGS) capacity exist in-country?<br><br><i>*This refers to NGS capacity regardless of whether it is used for pathogen genomic surveillance</i> | Yes <input type="checkbox"/><br>No <input type="checkbox"/><br><br>What proportion of NGS capacity lies in:<br><table border="1" style="width: 100%; border-collapse: collapse;"> <thead> <tr style="background-color: #cccccc;"> <th style="width: 70%;">Sector</th> <th style="width: 30%;">Proportion (%)</th> </tr> </thead> <tbody> <tr><td>Public</td><td></td></tr> <tr><td>Private</td><td></td></tr> <tr><td>Academic Institution</td><td></td></tr> <tr><td>Other (List)</td><td></td></tr> </tbody> </table>                                     | Sector | Proportion (%) | Public |  | Private |  | Academic Institution |  | Other (List) |  |
| Sector                          | Proportion (%)                                                                                                                                                                 |                                                                                                                                                                                                                                                                                                                                                                                                                                                                                                                                                             |        |                |        |  |         |  |                      |  |              |  |
| Public                          |                                                                                                                                                                                |                                                                                                                                                                                                                                                                                                                                                                                                                                                                                                                                                             |        |                |        |  |         |  |                      |  |              |  |
| Private                         |                                                                                                                                                                                |                                                                                                                                                                                                                                                                                                                                                                                                                                                                                                                                                             |        |                |        |  |         |  |                      |  |              |  |
| Academic Institution            |                                                                                                                                                                                |                                                                                                                                                                                                                                                                                                                                                                                                                                                                                                                                                             |        |                |        |  |         |  |                      |  |              |  |
| Other (List)                    |                                                                                                                                                                                |                                                                                                                                                                                                                                                                                                                                                                                                                                                                                                                                                             |        |                |        |  |         |  |                      |  |              |  |
| 1.1.2                           | Has NGS been used to support <b>pathogen genomic surveillance</b> between 2020 and 2022?*                                                                                      | Yes <input type="checkbox"/><br>No <input type="checkbox"/><br><br>What proportion of NGS-related pathogen genomic surveillance takes place in:<br><table border="1" style="width: 100%; border-collapse: collapse;"> <thead> <tr style="background-color: #cccccc;"> <th style="width: 70%;">Sector</th> <th style="width: 30%;">Proportion (%)</th> </tr> </thead> <tbody> <tr><td>Public</td><td></td></tr> <tr><td>Private</td><td></td></tr> <tr><td>Academic Institution</td><td></td></tr> <tr><td>Other (List)</td><td></td></tr> </tbody> </table> | Sector | Proportion (%) | Public |  | Private |  | Academic Institution |  | Other (List) |  |
| Sector                          | Proportion (%)                                                                                                                                                                 |                                                                                                                                                                                                                                                                                                                                                                                                                                                                                                                                                             |        |                |        |  |         |  |                      |  |              |  |
| Public                          |                                                                                                                                                                                |                                                                                                                                                                                                                                                                                                                                                                                                                                                                                                                                                             |        |                |        |  |         |  |                      |  |              |  |
| Private                         |                                                                                                                                                                                |                                                                                                                                                                                                                                                                                                                                                                                                                                                                                                                                                             |        |                |        |  |         |  |                      |  |              |  |
| Academic Institution            |                                                                                                                                                                                |                                                                                                                                                                                                                                                                                                                                                                                                                                                                                                                                                             |        |                |        |  |         |  |                      |  |              |  |
| Other (List)                    |                                                                                                                                                                                |                                                                                                                                                                                                                                                                                                                                                                                                                                                                                                                                                             |        |                |        |  |         |  |                      |  |              |  |
|                                 | <i>*In this survey, pathogen genomic surveillance refers to the adoption of NGS for public health purposes and includes metagenomics or targeted approaches.</i>               |                                                                                                                                                                                                                                                                                                                                                                                                                                                                                                                                                             |        |                |        |  |         |  |                      |  |              |  |



| 1.1.3                              | Do laboratories conducting NGS for pathogen genomic surveillance need to be registered?                                                                                                                                                                                                                                                                                                                                                                                                                                                                                                                                                                                                                                                                                                                                                                                                                                                                                                                                                                                                                                                                                                                                                                                                                                                                                                                                                                                                                                                                                                                | Yes <input type="checkbox"/><br>No <input type="checkbox"/> → Skip to 1.1.5 |              |                                         |                       |  |                     |  |            |  |                                    |  |               |  |              |  |                |  |
|------------------------------------|--------------------------------------------------------------------------------------------------------------------------------------------------------------------------------------------------------------------------------------------------------------------------------------------------------------------------------------------------------------------------------------------------------------------------------------------------------------------------------------------------------------------------------------------------------------------------------------------------------------------------------------------------------------------------------------------------------------------------------------------------------------------------------------------------------------------------------------------------------------------------------------------------------------------------------------------------------------------------------------------------------------------------------------------------------------------------------------------------------------------------------------------------------------------------------------------------------------------------------------------------------------------------------------------------------------------------------------------------------------------------------------------------------------------------------------------------------------------------------------------------------------------------------------------------------------------------------------------------------|-----------------------------------------------------------------------------|--------------|-----------------------------------------|-----------------------|--|---------------------|--|------------|--|------------------------------------|--|---------------|--|--------------|--|----------------|--|
| 1.1.4                              | If yes to the question above, what institution(s) oversee the registration?                                                                                                                                                                                                                                                                                                                                                                                                                                                                                                                                                                                                                                                                                                                                                                                                                                                                                                                                                                                                                                                                                                                                                                                                                                                                                                                                                                                                                                                                                                                            |                                                                             |              |                                         |                       |  |                     |  |            |  |                                    |  |               |  |              |  |                |  |
| 1.1.5                              | <p>What proportion of samples collected for pathogen genomic surveillance by the government are processed out-of-country in the past year?</p> <table border="1" style="margin-left: auto; margin-right: auto;"> <thead> <tr> <th>Process step</th> <th>Proportion processed out-of-country (%)</th> </tr> </thead> <tbody> <tr><td>Sample pre-processing</td><td></td></tr> <tr><td>Library preparation</td><td></td></tr> <tr><td>Sequencing</td><td></td></tr> <tr><td>Data processing and bioinformatics</td><td></td></tr> <tr><td>Data analysis</td><td></td></tr> <tr><td>Data sharing</td><td></td></tr> <tr><td>Data reporting</td><td></td></tr> </tbody> </table> <p><i>*Definitions of the NGS process used throughout this survey:</i></p> <ul style="list-style-type: none"> <li>– <i>Sample pre-processing: laboratory procedures prior to sequencing such as nucleic acid extraction and/or preamplification steps.</i></li> <li>– <i>Library preparation: the first step of the NGS process where samples are prepared for loading into a sequencer.</i></li> <li>– <i>Sequencing: loading of prepared libraries into the NGS machine and ensuing reactions.</i></li> <li>– <i>Data processing and bioinformatics: genomic sequence generation from raw NGS data.</i></li> <li>– <i>Data analysis: how genomic data is utilized (e.g. for variant analysis, phylogeny or molecular epidemiology)</i></li> <li>– <i>Data sharing: upload of data on public repositories</i></li> <li>– <i>Data reporting: reporting of results to government for public health purposes</i></li> </ul> |                                                                             | Process step | Proportion processed out-of-country (%) | Sample pre-processing |  | Library preparation |  | Sequencing |  | Data processing and bioinformatics |  | Data analysis |  | Data sharing |  | Data reporting |  |
| Process step                       | Proportion processed out-of-country (%)                                                                                                                                                                                                                                                                                                                                                                                                                                                                                                                                                                                                                                                                                                                                                                                                                                                                                                                                                                                                                                                                                                                                                                                                                                                                                                                                                                                                                                                                                                                                                                |                                                                             |              |                                         |                       |  |                     |  |            |  |                                    |  |               |  |              |  |                |  |
| Sample pre-processing              |                                                                                                                                                                                                                                                                                                                                                                                                                                                                                                                                                                                                                                                                                                                                                                                                                                                                                                                                                                                                                                                                                                                                                                                                                                                                                                                                                                                                                                                                                                                                                                                                        |                                                                             |              |                                         |                       |  |                     |  |            |  |                                    |  |               |  |              |  |                |  |
| Library preparation                |                                                                                                                                                                                                                                                                                                                                                                                                                                                                                                                                                                                                                                                                                                                                                                                                                                                                                                                                                                                                                                                                                                                                                                                                                                                                                                                                                                                                                                                                                                                                                                                                        |                                                                             |              |                                         |                       |  |                     |  |            |  |                                    |  |               |  |              |  |                |  |
| Sequencing                         |                                                                                                                                                                                                                                                                                                                                                                                                                                                                                                                                                                                                                                                                                                                                                                                                                                                                                                                                                                                                                                                                                                                                                                                                                                                                                                                                                                                                                                                                                                                                                                                                        |                                                                             |              |                                         |                       |  |                     |  |            |  |                                    |  |               |  |              |  |                |  |
| Data processing and bioinformatics |                                                                                                                                                                                                                                                                                                                                                                                                                                                                                                                                                                                                                                                                                                                                                                                                                                                                                                                                                                                                                                                                                                                                                                                                                                                                                                                                                                                                                                                                                                                                                                                                        |                                                                             |              |                                         |                       |  |                     |  |            |  |                                    |  |               |  |              |  |                |  |
| Data analysis                      |                                                                                                                                                                                                                                                                                                                                                                                                                                                                                                                                                                                                                                                                                                                                                                                                                                                                                                                                                                                                                                                                                                                                                                                                                                                                                                                                                                                                                                                                                                                                                                                                        |                                                                             |              |                                         |                       |  |                     |  |            |  |                                    |  |               |  |              |  |                |  |
| Data sharing                       |                                                                                                                                                                                                                                                                                                                                                                                                                                                                                                                                                                                                                                                                                                                                                                                                                                                                                                                                                                                                                                                                                                                                                                                                                                                                                                                                                                                                                                                                                                                                                                                                        |                                                                             |              |                                         |                       |  |                     |  |            |  |                                    |  |               |  |              |  |                |  |
| Data reporting                     |                                                                                                                                                                                                                                                                                                                                                                                                                                                                                                                                                                                                                                                                                                                                                                                                                                                                                                                                                                                                                                                                                                                                                                                                                                                                                                                                                                                                                                                                                                                                                                                                        |                                                                             |              |                                         |                       |  |                     |  |            |  |                                    |  |               |  |              |  |                |  |

| Part 1.2: National Partners |                                                                                                                                                                                                                                    |                                                             |
|-----------------------------|------------------------------------------------------------------------------------------------------------------------------------------------------------------------------------------------------------------------------------|-------------------------------------------------------------|
| 1.2.1                       | Is there a national institution or consortium responsible for coordinating national and sub-national NGS for pathogen genomic surveillance?<br><br><i>National coordination mechanism may refer to any national network/entity</i> | Yes <input type="checkbox"/><br>No <input type="checkbox"/> |
| 1.2.2                       | Who are the national partners currently involved in public health pathogen genomic surveillance in the country?                                                                                                                    | List                                                        |
| 1.2.3                       | Has a national expert panel/technical advisory group been established to advise government on pathogen genomic surveillance and data interpretation/use?                                                                           | Yes <input type="checkbox"/><br>No <input type="checkbox"/> |

| Part 1.3: Planning, Financing, and External Partnerships |                                                                                                 |                                                                             |
|----------------------------------------------------------|-------------------------------------------------------------------------------------------------|-----------------------------------------------------------------------------|
| 1.3.1                                                    | Is there a national strategic plan in which pathogen genomic surveillance capacity is included? | Yes <input type="checkbox"/><br>No <input type="checkbox"/> → Skip to 1.3.6 |
| 1.3.2                                                    | Which ministry is responsible for the national pathogen genomic surveillance strategic plan?    | Open text                                                                   |
| 1.3.3                                                    | Does the genomic surveillance plan identify priority pathogens?                                 | Yes <input type="checkbox"/><br>No <input type="checkbox"/>                 |
| 1.3.4                                                    | Does the plan contain indicators and targets for pathogen genomic surveillance?                 | Yes <input type="checkbox"/><br>No <input type="checkbox"/>                 |
| 1.3.5                                                    | Has the plan for genomic surveillance been costed?                                              | Yes <input type="checkbox"/><br>No <input type="checkbox"/>                 |

|       |                                                                        |                                                                             |
|-------|------------------------------------------------------------------------|-----------------------------------------------------------------------------|
| 1.3.6 | Is there a national annual budget allocation for genomic surveillance? | Yes <input type="checkbox"/><br>No <input type="checkbox"/> → Skip to 1.3.8 |
| 1.3.7 | Which ministry is responsible for managing the NGS budget?             | Open text                                                                   |

1.3.8 What estimated proportion of spending on NGS capacity for pathogen genomics surveillance from the last year was derived from:

| Sector                                  | Proportion (%) |
|-----------------------------------------|----------------|
| Public funding                          |                |
| Private funding                         |                |
| Academic grants                         |                |
| Donations                               |                |
| External partner based funding          |                |
| Other (e.g. NGOs, civil societies etc.) |                |

*Public funding includes funding from public treasury*  
*Private funding includes investments from private companies, firms and industry partners*  
*Academic grants include seed funding from educational/research institutions*  
*Donations include funding from philanthropic organisations*  
*External partner-based funding includes international organisations and collaborators from public, private or academic institutions*

1.3.9 Post COVID-19, have **sufficient and sustainable sources of funding** been identified to support the following areas of pathogen genomic surveillance?  
*“Sufficient and sustainable funding” refers to sources committed to provide resources for at least a 5-year period*

| Process step                                                                  | National Partners (LIST) | External Partners (LIST) | Sufficient funding<br>Scale: 1 (scarce funds) – 5 (excess funds) | Sustainable funding<br>Scale: 1 (not sustainable) – 5 (very sustainable) |
|-------------------------------------------------------------------------------|--------------------------|--------------------------|------------------------------------------------------------------|--------------------------------------------------------------------------|
| Sample pre-processing (Reagents etc.)                                         |                          |                          |                                                                  |                                                                          |
| Wet lab sequencing (Reagents, equipment, staffing, training etc.)             |                          |                          |                                                                  |                                                                          |
| Data processing and bioinformatics (Equipment, infrastructure, training etc.) |                          |                          |                                                                  |                                                                          |
| Data analysis                                                                 |                          |                          |                                                                  |                                                                          |
| Data storage                                                                  |                          |                          |                                                                  |                                                                          |
| Data sharing                                                                  |                          |                          |                                                                  |                                                                          |
| Data reporting to government                                                  |                          |                          |                                                                  |                                                                          |
| Training                                                                      |                          |                          |                                                                  |                                                                          |

| 1.3.10                                                                        | <p>Was external partner support received for COVID-19 related NGS in the past year?</p> <table border="1" data-bbox="568 244 1152 880"> <thead> <tr> <th>Type of support provided out-of-country (or locally via external partners)</th> <th>Tick all that apply</th> </tr> </thead> <tbody> <tr> <td>Financial</td> <td></td> </tr> <tr> <td>Donation of equipment</td> <td></td> </tr> <tr> <td>Donation of reagents</td> <td></td> </tr> <tr> <td>Laboratory training</td> <td></td> </tr> <tr> <td>Bioinformatics training</td> <td></td> </tr> <tr> <td>Data processing and bioinformatics</td> <td></td> </tr> <tr> <td>Data analysis</td> <td></td> </tr> <tr> <td colspan="2">Other in-kind support:<br/><i>[short open text]</i></td> </tr> </tbody> </table>                                                                                                                                                                                       | Type of support provided out-of-country (or locally via external partners) | Tick all that apply      | Financial                |                   | Donation of equipment |  | Donation of reagents                  |  | Laboratory training |                                                                   | Bioinformatics training |  | Data processing and bioinformatics                                            |  | Data analysis |               | Other in-kind support:<br><i>[short open text]</i> |  |              |  |  |              |  |  |                              |  |  |          |  |  |
|-------------------------------------------------------------------------------|--------------------------------------------------------------------------------------------------------------------------------------------------------------------------------------------------------------------------------------------------------------------------------------------------------------------------------------------------------------------------------------------------------------------------------------------------------------------------------------------------------------------------------------------------------------------------------------------------------------------------------------------------------------------------------------------------------------------------------------------------------------------------------------------------------------------------------------------------------------------------------------------------------------------------------------------------------------|----------------------------------------------------------------------------|--------------------------|--------------------------|-------------------|-----------------------|--|---------------------------------------|--|---------------------|-------------------------------------------------------------------|-------------------------|--|-------------------------------------------------------------------------------|--|---------------|---------------|----------------------------------------------------|--|--------------|--|--|--------------|--|--|------------------------------|--|--|----------|--|--|
| Type of support provided out-of-country (or locally via external partners)    | Tick all that apply                                                                                                                                                                                                                                                                                                                                                                                                                                                                                                                                                                                                                                                                                                                                                                                                                                                                                                                                          |                                                                            |                          |                          |                   |                       |  |                                       |  |                     |                                                                   |                         |  |                                                                               |  |               |               |                                                    |  |              |  |  |              |  |  |                              |  |  |          |  |  |
| Financial                                                                     |                                                                                                                                                                                                                                                                                                                                                                                                                                                                                                                                                                                                                                                                                                                                                                                                                                                                                                                                                              |                                                                            |                          |                          |                   |                       |  |                                       |  |                     |                                                                   |                         |  |                                                                               |  |               |               |                                                    |  |              |  |  |              |  |  |                              |  |  |          |  |  |
| Donation of equipment                                                         |                                                                                                                                                                                                                                                                                                                                                                                                                                                                                                                                                                                                                                                                                                                                                                                                                                                                                                                                                              |                                                                            |                          |                          |                   |                       |  |                                       |  |                     |                                                                   |                         |  |                                                                               |  |               |               |                                                    |  |              |  |  |              |  |  |                              |  |  |          |  |  |
| Donation of reagents                                                          |                                                                                                                                                                                                                                                                                                                                                                                                                                                                                                                                                                                                                                                                                                                                                                                                                                                                                                                                                              |                                                                            |                          |                          |                   |                       |  |                                       |  |                     |                                                                   |                         |  |                                                                               |  |               |               |                                                    |  |              |  |  |              |  |  |                              |  |  |          |  |  |
| Laboratory training                                                           |                                                                                                                                                                                                                                                                                                                                                                                                                                                                                                                                                                                                                                                                                                                                                                                                                                                                                                                                                              |                                                                            |                          |                          |                   |                       |  |                                       |  |                     |                                                                   |                         |  |                                                                               |  |               |               |                                                    |  |              |  |  |              |  |  |                              |  |  |          |  |  |
| Bioinformatics training                                                       |                                                                                                                                                                                                                                                                                                                                                                                                                                                                                                                                                                                                                                                                                                                                                                                                                                                                                                                                                              |                                                                            |                          |                          |                   |                       |  |                                       |  |                     |                                                                   |                         |  |                                                                               |  |               |               |                                                    |  |              |  |  |              |  |  |                              |  |  |          |  |  |
| Data processing and bioinformatics                                            |                                                                                                                                                                                                                                                                                                                                                                                                                                                                                                                                                                                                                                                                                                                                                                                                                                                                                                                                                              |                                                                            |                          |                          |                   |                       |  |                                       |  |                     |                                                                   |                         |  |                                                                               |  |               |               |                                                    |  |              |  |  |              |  |  |                              |  |  |          |  |  |
| Data analysis                                                                 |                                                                                                                                                                                                                                                                                                                                                                                                                                                                                                                                                                                                                                                                                                                                                                                                                                                                                                                                                              |                                                                            |                          |                          |                   |                       |  |                                       |  |                     |                                                                   |                         |  |                                                                               |  |               |               |                                                    |  |              |  |  |              |  |  |                              |  |  |          |  |  |
| Other in-kind support:<br><i>[short open text]</i>                            |                                                                                                                                                                                                                                                                                                                                                                                                                                                                                                                                                                                                                                                                                                                                                                                                                                                                                                                                                              |                                                                            |                          |                          |                   |                       |  |                                       |  |                     |                                                                   |                         |  |                                                                               |  |               |               |                                                    |  |              |  |  |              |  |  |                              |  |  |          |  |  |
| 1.3.11                                                                        | <p>Are discussions underway with potential new partners to support genomic surveillance capacity? Yes <input type="checkbox"/><br/>                 No <input type="checkbox"/> → Skip to section 1.4</p>                                                                                                                                                                                                                                                                                                                                                                                                                                                                                                                                                                                                                                                                                                                                                    |                                                                            |                          |                          |                   |                       |  |                                       |  |                     |                                                                   |                         |  |                                                                               |  |               |               |                                                    |  |              |  |  |              |  |  |                              |  |  |          |  |  |
| 1.3.12                                                                        | <p>If yes, please list the partner(s) and identify the potential area(s) of new support:</p> <table border="1" data-bbox="360 1099 1359 1603"> <thead> <tr> <th>Process step</th> <th>National Partners (List)</th> <th>External Partners (List)</th> </tr> </thead> <tbody> <tr> <td>Sample collection</td> <td></td> <td></td> </tr> <tr> <td>Sample pre-processing (Reagents etc.)</td> <td></td> <td></td> </tr> <tr> <td>Wet lab sequencing (Reagents, equipment, staffing, training etc.)</td> <td></td> <td></td> </tr> <tr> <td>Data processing and bioinformatics (Equipment, infrastructure, training etc.)</td> <td></td> <td></td> </tr> <tr> <td>Data analysis</td> <td></td> <td></td> </tr> <tr> <td>Data storage</td> <td></td> <td></td> </tr> <tr> <td>Data sharing</td> <td></td> <td></td> </tr> <tr> <td>Data reporting to government</td> <td></td> <td></td> </tr> <tr> <td>Training</td> <td></td> <td></td> </tr> </tbody> </table> | Process step                                                               | National Partners (List) | External Partners (List) | Sample collection |                       |  | Sample pre-processing (Reagents etc.) |  |                     | Wet lab sequencing (Reagents, equipment, staffing, training etc.) |                         |  | Data processing and bioinformatics (Equipment, infrastructure, training etc.) |  |               | Data analysis |                                                    |  | Data storage |  |  | Data sharing |  |  | Data reporting to government |  |  | Training |  |  |
| Process step                                                                  | National Partners (List)                                                                                                                                                                                                                                                                                                                                                                                                                                                                                                                                                                                                                                                                                                                                                                                                                                                                                                                                     | External Partners (List)                                                   |                          |                          |                   |                       |  |                                       |  |                     |                                                                   |                         |  |                                                                               |  |               |               |                                                    |  |              |  |  |              |  |  |                              |  |  |          |  |  |
| Sample collection                                                             |                                                                                                                                                                                                                                                                                                                                                                                                                                                                                                                                                                                                                                                                                                                                                                                                                                                                                                                                                              |                                                                            |                          |                          |                   |                       |  |                                       |  |                     |                                                                   |                         |  |                                                                               |  |               |               |                                                    |  |              |  |  |              |  |  |                              |  |  |          |  |  |
| Sample pre-processing (Reagents etc.)                                         |                                                                                                                                                                                                                                                                                                                                                                                                                                                                                                                                                                                                                                                                                                                                                                                                                                                                                                                                                              |                                                                            |                          |                          |                   |                       |  |                                       |  |                     |                                                                   |                         |  |                                                                               |  |               |               |                                                    |  |              |  |  |              |  |  |                              |  |  |          |  |  |
| Wet lab sequencing (Reagents, equipment, staffing, training etc.)             |                                                                                                                                                                                                                                                                                                                                                                                                                                                                                                                                                                                                                                                                                                                                                                                                                                                                                                                                                              |                                                                            |                          |                          |                   |                       |  |                                       |  |                     |                                                                   |                         |  |                                                                               |  |               |               |                                                    |  |              |  |  |              |  |  |                              |  |  |          |  |  |
| Data processing and bioinformatics (Equipment, infrastructure, training etc.) |                                                                                                                                                                                                                                                                                                                                                                                                                                                                                                                                                                                                                                                                                                                                                                                                                                                                                                                                                              |                                                                            |                          |                          |                   |                       |  |                                       |  |                     |                                                                   |                         |  |                                                                               |  |               |               |                                                    |  |              |  |  |              |  |  |                              |  |  |          |  |  |
| Data analysis                                                                 |                                                                                                                                                                                                                                                                                                                                                                                                                                                                                                                                                                                                                                                                                                                                                                                                                                                                                                                                                              |                                                                            |                          |                          |                   |                       |  |                                       |  |                     |                                                                   |                         |  |                                                                               |  |               |               |                                                    |  |              |  |  |              |  |  |                              |  |  |          |  |  |
| Data storage                                                                  |                                                                                                                                                                                                                                                                                                                                                                                                                                                                                                                                                                                                                                                                                                                                                                                                                                                                                                                                                              |                                                                            |                          |                          |                   |                       |  |                                       |  |                     |                                                                   |                         |  |                                                                               |  |               |               |                                                    |  |              |  |  |              |  |  |                              |  |  |          |  |  |
| Data sharing                                                                  |                                                                                                                                                                                                                                                                                                                                                                                                                                                                                                                                                                                                                                                                                                                                                                                                                                                                                                                                                              |                                                                            |                          |                          |                   |                       |  |                                       |  |                     |                                                                   |                         |  |                                                                               |  |               |               |                                                    |  |              |  |  |              |  |  |                              |  |  |          |  |  |
| Data reporting to government                                                  |                                                                                                                                                                                                                                                                                                                                                                                                                                                                                                                                                                                                                                                                                                                                                                                                                                                                                                                                                              |                                                                            |                          |                          |                   |                       |  |                                       |  |                     |                                                                   |                         |  |                                                                               |  |               |               |                                                    |  |              |  |  |              |  |  |                              |  |  |          |  |  |
| Training                                                                      |                                                                                                                                                                                                                                                                                                                                                                                                                                                                                                                                                                                                                                                                                                                                                                                                                                                                                                                                                              |                                                                            |                          |                          |                   |                       |  |                                       |  |                     |                                                                   |                         |  |                                                                               |  |               |               |                                                    |  |              |  |  |              |  |  |                              |  |  |          |  |  |

**Part 1.4: Cost Drivers**

|       |                                                                                             |
|-------|---------------------------------------------------------------------------------------------|
| 1.4.1 | Which of the following were major cost drivers for genomic surveillance over the past year: |
|-------|---------------------------------------------------------------------------------------------|

| <b>Direct Sample and Processing Costs</b>                            |  | <b>Scale: 1 – 5 *</b> |
|----------------------------------------------------------------------|--|-----------------------|
| Laboratory equipment (sequencing machines, sample storage equipment) |  |                       |
| Laboratory supplies & consumables (reagents, PPE, etc)               |  |                       |
| Bioinformatics and computing infrastructure/equipment                |  |                       |
| Transportation of samples                                            |  |                       |
| Labour costs (laboratory staff, bioinformatics staff)                |  |                       |
| Staff training                                                       |  |                       |
| Waste management                                                     |  |                       |

  

| <b>Indirect Costs</b>                                                                  |  | <b>Scale: 1 - 5 *</b> |
|----------------------------------------------------------------------------------------|--|-----------------------|
| Regulatory requirements (inspection, proficiency testing, quality assurance processes) |  |                       |
| Supply chain & procurement (supplier, distributor, shipping)                           |  |                       |
| Maintenance contract costs (for equipment, facilities, storage)                        |  |                       |
| Facilities costs (rental, land costs)                                                  |  |                       |
| Administrative expenses                                                                |  |                       |
| Insurance costs                                                                        |  |                       |

*\* Scale: 1 = Not a cost driver, 2 = Minor cost driver, 3 = Neutral, 4 = Moderate cost driver, 5 = Major cost driver*

| <b>Section 2: Policy Context</b>                                    |                                                                                                                                                                                                                                                                                                                                                                                                                                                                                                                                                                                                                                                                                                                                                                                                                                                                                                                                                                                 |                         |                                          |              |  |                                                                     |  |                                                                  |  |         |  |                                    |  |                   |  |                             |  |       |  |                     |  |     |  |               |  |             |  |                                                      |  |                         |  |
|---------------------------------------------------------------------|---------------------------------------------------------------------------------------------------------------------------------------------------------------------------------------------------------------------------------------------------------------------------------------------------------------------------------------------------------------------------------------------------------------------------------------------------------------------------------------------------------------------------------------------------------------------------------------------------------------------------------------------------------------------------------------------------------------------------------------------------------------------------------------------------------------------------------------------------------------------------------------------------------------------------------------------------------------------------------|-------------------------|------------------------------------------|--------------|--|---------------------------------------------------------------------|--|------------------------------------------------------------------|--|---------|--|------------------------------------|--|-------------------|--|-----------------------------|--|-------|--|---------------------|--|-----|--|---------------|--|-------------|--|------------------------------------------------------|--|-------------------------|--|
| <b>Part 2.1: Policy Framework and Priority Pathogens</b>            |                                                                                                                                                                                                                                                                                                                                                                                                                                                                                                                                                                                                                                                                                                                                                                                                                                                                                                                                                                                 |                         |                                          |              |  |                                                                     |  |                                                                  |  |         |  |                                    |  |                   |  |                             |  |       |  |                     |  |     |  |               |  |             |  |                                                      |  |                         |  |
| 2.1.1                                                               | In your country, which pathogen/pathogen groups have been identified or discussed as priorities for pathogen genomic surveillance?                                                                                                                                                                                                                                                                                                                                                                                                                                                                                                                                                                                                                                                                                                                                                                                                                                              |                         |                                          |              |  |                                                                     |  |                                                                  |  |         |  |                                    |  |                   |  |                             |  |       |  |                     |  |     |  |               |  |             |  |                                                      |  |                         |  |
|                                                                     | <table border="1"> <thead> <tr> <th>Pathogen/Pathogen group</th> <th>Scale: 1 (Low priority) - 5 (Essential)*</th> </tr> </thead> <tbody> <tr> <td>Tuberculosis</td> <td></td> </tr> <tr> <td>Other bacterial pathogens for antimicrobial resistance surveillance</td> <td></td> </tr> <tr> <td>Other bacterial pathogens for food and water safety surveillance</td> <td></td> </tr> <tr> <td>Malaria</td> <td></td> </tr> <tr> <td>SARS-CoV-2 and other coronaviruses</td> <td></td> </tr> <tr> <td>Influenza viruses</td> <td></td> </tr> <tr> <td>Respiratory syncytial virus</td> <td></td> </tr> <tr> <td>Polio</td> <td></td> </tr> <tr> <td>Measles and Rubella</td> <td></td> </tr> <tr> <td>HIV</td> <td></td> </tr> <tr> <td>Henipaviruses</td> <td></td> </tr> <tr> <td>Arboviruses</td> <td></td> </tr> <tr> <td>Viral hemorrhagic fevers (Filoviruses/ arenaviruses)</td> <td></td> </tr> <tr> <td>Others (Please specify)</td> <td></td> </tr> </tbody> </table> | Pathogen/Pathogen group | Scale: 1 (Low priority) - 5 (Essential)* | Tuberculosis |  | Other bacterial pathogens for antimicrobial resistance surveillance |  | Other bacterial pathogens for food and water safety surveillance |  | Malaria |  | SARS-CoV-2 and other coronaviruses |  | Influenza viruses |  | Respiratory syncytial virus |  | Polio |  | Measles and Rubella |  | HIV |  | Henipaviruses |  | Arboviruses |  | Viral hemorrhagic fevers (Filoviruses/ arenaviruses) |  | Others (Please specify) |  |
| Pathogen/Pathogen group                                             | Scale: 1 (Low priority) - 5 (Essential)*                                                                                                                                                                                                                                                                                                                                                                                                                                                                                                                                                                                                                                                                                                                                                                                                                                                                                                                                        |                         |                                          |              |  |                                                                     |  |                                                                  |  |         |  |                                    |  |                   |  |                             |  |       |  |                     |  |     |  |               |  |             |  |                                                      |  |                         |  |
| Tuberculosis                                                        |                                                                                                                                                                                                                                                                                                                                                                                                                                                                                                                                                                                                                                                                                                                                                                                                                                                                                                                                                                                 |                         |                                          |              |  |                                                                     |  |                                                                  |  |         |  |                                    |  |                   |  |                             |  |       |  |                     |  |     |  |               |  |             |  |                                                      |  |                         |  |
| Other bacterial pathogens for antimicrobial resistance surveillance |                                                                                                                                                                                                                                                                                                                                                                                                                                                                                                                                                                                                                                                                                                                                                                                                                                                                                                                                                                                 |                         |                                          |              |  |                                                                     |  |                                                                  |  |         |  |                                    |  |                   |  |                             |  |       |  |                     |  |     |  |               |  |             |  |                                                      |  |                         |  |
| Other bacterial pathogens for food and water safety surveillance    |                                                                                                                                                                                                                                                                                                                                                                                                                                                                                                                                                                                                                                                                                                                                                                                                                                                                                                                                                                                 |                         |                                          |              |  |                                                                     |  |                                                                  |  |         |  |                                    |  |                   |  |                             |  |       |  |                     |  |     |  |               |  |             |  |                                                      |  |                         |  |
| Malaria                                                             |                                                                                                                                                                                                                                                                                                                                                                                                                                                                                                                                                                                                                                                                                                                                                                                                                                                                                                                                                                                 |                         |                                          |              |  |                                                                     |  |                                                                  |  |         |  |                                    |  |                   |  |                             |  |       |  |                     |  |     |  |               |  |             |  |                                                      |  |                         |  |
| SARS-CoV-2 and other coronaviruses                                  |                                                                                                                                                                                                                                                                                                                                                                                                                                                                                                                                                                                                                                                                                                                                                                                                                                                                                                                                                                                 |                         |                                          |              |  |                                                                     |  |                                                                  |  |         |  |                                    |  |                   |  |                             |  |       |  |                     |  |     |  |               |  |             |  |                                                      |  |                         |  |
| Influenza viruses                                                   |                                                                                                                                                                                                                                                                                                                                                                                                                                                                                                                                                                                                                                                                                                                                                                                                                                                                                                                                                                                 |                         |                                          |              |  |                                                                     |  |                                                                  |  |         |  |                                    |  |                   |  |                             |  |       |  |                     |  |     |  |               |  |             |  |                                                      |  |                         |  |
| Respiratory syncytial virus                                         |                                                                                                                                                                                                                                                                                                                                                                                                                                                                                                                                                                                                                                                                                                                                                                                                                                                                                                                                                                                 |                         |                                          |              |  |                                                                     |  |                                                                  |  |         |  |                                    |  |                   |  |                             |  |       |  |                     |  |     |  |               |  |             |  |                                                      |  |                         |  |
| Polio                                                               |                                                                                                                                                                                                                                                                                                                                                                                                                                                                                                                                                                                                                                                                                                                                                                                                                                                                                                                                                                                 |                         |                                          |              |  |                                                                     |  |                                                                  |  |         |  |                                    |  |                   |  |                             |  |       |  |                     |  |     |  |               |  |             |  |                                                      |  |                         |  |
| Measles and Rubella                                                 |                                                                                                                                                                                                                                                                                                                                                                                                                                                                                                                                                                                                                                                                                                                                                                                                                                                                                                                                                                                 |                         |                                          |              |  |                                                                     |  |                                                                  |  |         |  |                                    |  |                   |  |                             |  |       |  |                     |  |     |  |               |  |             |  |                                                      |  |                         |  |
| HIV                                                                 |                                                                                                                                                                                                                                                                                                                                                                                                                                                                                                                                                                                                                                                                                                                                                                                                                                                                                                                                                                                 |                         |                                          |              |  |                                                                     |  |                                                                  |  |         |  |                                    |  |                   |  |                             |  |       |  |                     |  |     |  |               |  |             |  |                                                      |  |                         |  |
| Henipaviruses                                                       |                                                                                                                                                                                                                                                                                                                                                                                                                                                                                                                                                                                                                                                                                                                                                                                                                                                                                                                                                                                 |                         |                                          |              |  |                                                                     |  |                                                                  |  |         |  |                                    |  |                   |  |                             |  |       |  |                     |  |     |  |               |  |             |  |                                                      |  |                         |  |
| Arboviruses                                                         |                                                                                                                                                                                                                                                                                                                                                                                                                                                                                                                                                                                                                                                                                                                                                                                                                                                                                                                                                                                 |                         |                                          |              |  |                                                                     |  |                                                                  |  |         |  |                                    |  |                   |  |                             |  |       |  |                     |  |     |  |               |  |             |  |                                                      |  |                         |  |
| Viral hemorrhagic fevers (Filoviruses/ arenaviruses)                |                                                                                                                                                                                                                                                                                                                                                                                                                                                                                                                                                                                                                                                                                                                                                                                                                                                                                                                                                                                 |                         |                                          |              |  |                                                                     |  |                                                                  |  |         |  |                                    |  |                   |  |                             |  |       |  |                     |  |     |  |               |  |             |  |                                                      |  |                         |  |
| Others (Please specify)                                             |                                                                                                                                                                                                                                                                                                                                                                                                                                                                                                                                                                                                                                                                                                                                                                                                                                                                                                                                                                                 |                         |                                          |              |  |                                                                     |  |                                                                  |  |         |  |                                    |  |                   |  |                             |  |       |  |                     |  |     |  |               |  |             |  |                                                      |  |                         |  |
|                                                                     | <i>*(1 Not a priority, 2 Low priority, 3 Medium priority, 4 High priority, 5 Essential)</i>                                                                                                                                                                                                                                                                                                                                                                                                                                                                                                                                                                                                                                                                                                                                                                                                                                                                                     |                         |                                          |              |  |                                                                     |  |                                                                  |  |         |  |                                    |  |                   |  |                             |  |       |  |                     |  |     |  |               |  |             |  |                                                      |  |                         |  |

2.1.2

Other than NGS, which of the following complementary molecular diagnostic capabilities does your country have for the detection of identified priority pathogens?

*Select all that apply*

| Pathogen/pathogen group                                             | Traditional PCR and gel electrophoresis | Sanger sequencing | Real-time PCR assays | Multiplexed pathogen PCR / syndromic panels* |
|---------------------------------------------------------------------|-----------------------------------------|-------------------|----------------------|----------------------------------------------|
| Tuberculosis                                                        |                                         |                   |                      |                                              |
| Other bacterial pathogens for antimicrobial resistance surveillance |                                         |                   |                      |                                              |
| Other bacterial pathogens for food and water safety surveillance    |                                         |                   |                      |                                              |
| Malaria                                                             |                                         |                   |                      |                                              |
| SARS-CoV-2 and other coronaviruses                                  |                                         |                   |                      |                                              |
| Influenza viruses                                                   |                                         |                   |                      |                                              |
| Respiratory syncytial virus                                         |                                         |                   |                      |                                              |
| Polio                                                               |                                         |                   |                      |                                              |
| Measles and Rubella                                                 |                                         |                   |                      |                                              |
| HIV                                                                 |                                         |                   |                      |                                              |
| Henipaviruses                                                       |                                         |                   |                      |                                              |
| Arboviruses                                                         |                                         |                   |                      |                                              |
| Viral hemorrhagic fevers (Filoviruses/ arenaviruses)                |                                         |                   |                      |                                              |
| Others (Please specify)                                             |                                         |                   |                      |                                              |

Examples of syndromic panels include BIOFIRE® FILMARRAY®, TaqMan® array cards, Seegene Allplex™ assays etc.

2.1.3

For which pathogen/pathogen groups have pathogen genomic surveillance been conducted in the past 5 years? In what context (human, animal, environmental samples during routine surveillance and/or outbreak response)?

Select all that apply. (RS= routine surveillance, O=outbreak, R=research)

|                                                                     | Human |   |   | Animal |   |   | Environment |   |   | Sequencing primarily conducted out of country? (Y/N) |
|---------------------------------------------------------------------|-------|---|---|--------|---|---|-------------|---|---|------------------------------------------------------|
|                                                                     | RS    | O | R | RS     | O | R | RS          | O | R |                                                      |
| Tuberculosis                                                        |       |   |   |        |   |   |             |   |   |                                                      |
| Other bacterial pathogens for antimicrobial resistance surveillance |       |   |   |        |   |   |             |   |   |                                                      |
| Other bacterial pathogens for food and water safety surveillance    |       |   |   |        |   |   |             |   |   |                                                      |
| Malaria                                                             |       |   |   |        |   |   |             |   |   |                                                      |
| SARS-CoV-2 and other coronaviruses                                  |       |   |   |        |   |   |             |   |   |                                                      |
| Influenza viruses                                                   |       |   |   |        |   |   |             |   |   |                                                      |
| Respiratory syncytial virus                                         |       |   |   |        |   |   |             |   |   |                                                      |
| Polio                                                               |       |   |   |        |   |   |             |   |   |                                                      |
| Measles and Rubella                                                 |       |   |   |        |   |   |             |   |   |                                                      |
| HIV                                                                 |       |   |   |        |   |   |             |   |   |                                                      |
| Henipaviruses                                                       |       |   |   |        |   |   |             |   |   |                                                      |
| Arboviruses                                                         |       |   |   |        |   |   |             |   |   |                                                      |
| Viral hemorrhagic fevers (Filoviruses/ arenaviruses)                |       |   |   |        |   |   |             |   |   |                                                      |
| Others (Please specify)                                             |       |   |   |        |   |   |             |   |   |                                                      |

| 2.1.4                                                               | <p>Which sampling sites (e.g. primary, secondary or tertiary level of care) are included in the sampling strategy for pathogen genomic surveillance?</p> <p><i>Select all that apply</i></p> <table border="1"> <thead> <tr> <th>Pathogen/pathogen group</th> <th>Primary care clinics</th> <th>Secondary hospitals</th> <th>Tertiary hospitals</th> <th>Animal/vector</th> </tr> </thead> <tbody> <tr><td>Tuberculosis</td><td></td><td></td><td></td><td></td></tr> <tr><td>Other bacterial pathogens for antimicrobial resistance surveillance</td><td></td><td></td><td></td><td></td></tr> <tr><td>Other bacterial pathogens for food and water safety surveillance</td><td></td><td></td><td></td><td></td></tr> <tr><td>Malaria</td><td></td><td></td><td></td><td></td></tr> <tr><td>SARS-CoV-2 and other coronaviruses</td><td></td><td></td><td></td><td></td></tr> <tr><td>Influenza viruses</td><td></td><td></td><td></td><td></td></tr> <tr><td>Respiratory syncytial virus</td><td></td><td></td><td></td><td></td></tr> <tr><td>Polio</td><td></td><td></td><td></td><td></td></tr> <tr><td>Measles and Rubella</td><td></td><td></td><td></td><td></td></tr> <tr><td>HIV</td><td></td><td></td><td></td><td></td></tr> <tr><td>Henipaviruses</td><td></td><td></td><td></td><td></td></tr> <tr><td>Arboviruses</td><td></td><td></td><td></td><td></td></tr> <tr><td>Viral hemorrhagic fevers (Filoviruses/ arenaviruses)</td><td></td><td></td><td></td><td></td></tr> <tr><td>Others (Please specify)</td><td></td><td></td><td></td><td></td></tr> </tbody> </table> | Pathogen/pathogen group                                                                                                                                                                                                                                                                                                                                                                                      | Primary care clinics | Secondary hospitals | Tertiary hospitals | Animal/vector            | Tuberculosis             |                          |  |  |  | Other bacterial pathogens for antimicrobial resistance surveillance |  |  |  |  | Other bacterial pathogens for food and water safety surveillance |  |  |  |  | Malaria |  |  |  |  | SARS-CoV-2 and other coronaviruses |  |  |  |  | Influenza viruses |  |  |  |  | Respiratory syncytial virus |  |  |  |  | Polio |  |  |  |  | Measles and Rubella |  |  |  |  | HIV |  |  |  |  | Henipaviruses |  |  |  |  | Arboviruses |  |  |  |  | Viral hemorrhagic fevers (Filoviruses/ arenaviruses) |  |  |  |  | Others (Please specify) |  |  |  |  |
|---------------------------------------------------------------------|------------------------------------------------------------------------------------------------------------------------------------------------------------------------------------------------------------------------------------------------------------------------------------------------------------------------------------------------------------------------------------------------------------------------------------------------------------------------------------------------------------------------------------------------------------------------------------------------------------------------------------------------------------------------------------------------------------------------------------------------------------------------------------------------------------------------------------------------------------------------------------------------------------------------------------------------------------------------------------------------------------------------------------------------------------------------------------------------------------------------------------------------------------------------------------------------------------------------------------------------------------------------------------------------------------------------------------------------------------------------------------------------------------------------------------------------------------------------------------------------------------------------------------------------------------------------------------------|--------------------------------------------------------------------------------------------------------------------------------------------------------------------------------------------------------------------------------------------------------------------------------------------------------------------------------------------------------------------------------------------------------------|----------------------|---------------------|--------------------|--------------------------|--------------------------|--------------------------|--|--|--|---------------------------------------------------------------------|--|--|--|--|------------------------------------------------------------------|--|--|--|--|---------|--|--|--|--|------------------------------------|--|--|--|--|-------------------|--|--|--|--|-----------------------------|--|--|--|--|-------|--|--|--|--|---------------------|--|--|--|--|-----|--|--|--|--|---------------|--|--|--|--|-------------|--|--|--|--|------------------------------------------------------|--|--|--|--|-------------------------|--|--|--|--|
| Pathogen/pathogen group                                             | Primary care clinics                                                                                                                                                                                                                                                                                                                                                                                                                                                                                                                                                                                                                                                                                                                                                                                                                                                                                                                                                                                                                                                                                                                                                                                                                                                                                                                                                                                                                                                                                                                                                                     | Secondary hospitals                                                                                                                                                                                                                                                                                                                                                                                          | Tertiary hospitals   | Animal/vector       |                    |                          |                          |                          |  |  |  |                                                                     |  |  |  |  |                                                                  |  |  |  |  |         |  |  |  |  |                                    |  |  |  |  |                   |  |  |  |  |                             |  |  |  |  |       |  |  |  |  |                     |  |  |  |  |     |  |  |  |  |               |  |  |  |  |             |  |  |  |  |                                                      |  |  |  |  |                         |  |  |  |  |
| Tuberculosis                                                        |                                                                                                                                                                                                                                                                                                                                                                                                                                                                                                                                                                                                                                                                                                                                                                                                                                                                                                                                                                                                                                                                                                                                                                                                                                                                                                                                                                                                                                                                                                                                                                                          |                                                                                                                                                                                                                                                                                                                                                                                                              |                      |                     |                    |                          |                          |                          |  |  |  |                                                                     |  |  |  |  |                                                                  |  |  |  |  |         |  |  |  |  |                                    |  |  |  |  |                   |  |  |  |  |                             |  |  |  |  |       |  |  |  |  |                     |  |  |  |  |     |  |  |  |  |               |  |  |  |  |             |  |  |  |  |                                                      |  |  |  |  |                         |  |  |  |  |
| Other bacterial pathogens for antimicrobial resistance surveillance |                                                                                                                                                                                                                                                                                                                                                                                                                                                                                                                                                                                                                                                                                                                                                                                                                                                                                                                                                                                                                                                                                                                                                                                                                                                                                                                                                                                                                                                                                                                                                                                          |                                                                                                                                                                                                                                                                                                                                                                                                              |                      |                     |                    |                          |                          |                          |  |  |  |                                                                     |  |  |  |  |                                                                  |  |  |  |  |         |  |  |  |  |                                    |  |  |  |  |                   |  |  |  |  |                             |  |  |  |  |       |  |  |  |  |                     |  |  |  |  |     |  |  |  |  |               |  |  |  |  |             |  |  |  |  |                                                      |  |  |  |  |                         |  |  |  |  |
| Other bacterial pathogens for food and water safety surveillance    |                                                                                                                                                                                                                                                                                                                                                                                                                                                                                                                                                                                                                                                                                                                                                                                                                                                                                                                                                                                                                                                                                                                                                                                                                                                                                                                                                                                                                                                                                                                                                                                          |                                                                                                                                                                                                                                                                                                                                                                                                              |                      |                     |                    |                          |                          |                          |  |  |  |                                                                     |  |  |  |  |                                                                  |  |  |  |  |         |  |  |  |  |                                    |  |  |  |  |                   |  |  |  |  |                             |  |  |  |  |       |  |  |  |  |                     |  |  |  |  |     |  |  |  |  |               |  |  |  |  |             |  |  |  |  |                                                      |  |  |  |  |                         |  |  |  |  |
| Malaria                                                             |                                                                                                                                                                                                                                                                                                                                                                                                                                                                                                                                                                                                                                                                                                                                                                                                                                                                                                                                                                                                                                                                                                                                                                                                                                                                                                                                                                                                                                                                                                                                                                                          |                                                                                                                                                                                                                                                                                                                                                                                                              |                      |                     |                    |                          |                          |                          |  |  |  |                                                                     |  |  |  |  |                                                                  |  |  |  |  |         |  |  |  |  |                                    |  |  |  |  |                   |  |  |  |  |                             |  |  |  |  |       |  |  |  |  |                     |  |  |  |  |     |  |  |  |  |               |  |  |  |  |             |  |  |  |  |                                                      |  |  |  |  |                         |  |  |  |  |
| SARS-CoV-2 and other coronaviruses                                  |                                                                                                                                                                                                                                                                                                                                                                                                                                                                                                                                                                                                                                                                                                                                                                                                                                                                                                                                                                                                                                                                                                                                                                                                                                                                                                                                                                                                                                                                                                                                                                                          |                                                                                                                                                                                                                                                                                                                                                                                                              |                      |                     |                    |                          |                          |                          |  |  |  |                                                                     |  |  |  |  |                                                                  |  |  |  |  |         |  |  |  |  |                                    |  |  |  |  |                   |  |  |  |  |                             |  |  |  |  |       |  |  |  |  |                     |  |  |  |  |     |  |  |  |  |               |  |  |  |  |             |  |  |  |  |                                                      |  |  |  |  |                         |  |  |  |  |
| Influenza viruses                                                   |                                                                                                                                                                                                                                                                                                                                                                                                                                                                                                                                                                                                                                                                                                                                                                                                                                                                                                                                                                                                                                                                                                                                                                                                                                                                                                                                                                                                                                                                                                                                                                                          |                                                                                                                                                                                                                                                                                                                                                                                                              |                      |                     |                    |                          |                          |                          |  |  |  |                                                                     |  |  |  |  |                                                                  |  |  |  |  |         |  |  |  |  |                                    |  |  |  |  |                   |  |  |  |  |                             |  |  |  |  |       |  |  |  |  |                     |  |  |  |  |     |  |  |  |  |               |  |  |  |  |             |  |  |  |  |                                                      |  |  |  |  |                         |  |  |  |  |
| Respiratory syncytial virus                                         |                                                                                                                                                                                                                                                                                                                                                                                                                                                                                                                                                                                                                                                                                                                                                                                                                                                                                                                                                                                                                                                                                                                                                                                                                                                                                                                                                                                                                                                                                                                                                                                          |                                                                                                                                                                                                                                                                                                                                                                                                              |                      |                     |                    |                          |                          |                          |  |  |  |                                                                     |  |  |  |  |                                                                  |  |  |  |  |         |  |  |  |  |                                    |  |  |  |  |                   |  |  |  |  |                             |  |  |  |  |       |  |  |  |  |                     |  |  |  |  |     |  |  |  |  |               |  |  |  |  |             |  |  |  |  |                                                      |  |  |  |  |                         |  |  |  |  |
| Polio                                                               |                                                                                                                                                                                                                                                                                                                                                                                                                                                                                                                                                                                                                                                                                                                                                                                                                                                                                                                                                                                                                                                                                                                                                                                                                                                                                                                                                                                                                                                                                                                                                                                          |                                                                                                                                                                                                                                                                                                                                                                                                              |                      |                     |                    |                          |                          |                          |  |  |  |                                                                     |  |  |  |  |                                                                  |  |  |  |  |         |  |  |  |  |                                    |  |  |  |  |                   |  |  |  |  |                             |  |  |  |  |       |  |  |  |  |                     |  |  |  |  |     |  |  |  |  |               |  |  |  |  |             |  |  |  |  |                                                      |  |  |  |  |                         |  |  |  |  |
| Measles and Rubella                                                 |                                                                                                                                                                                                                                                                                                                                                                                                                                                                                                                                                                                                                                                                                                                                                                                                                                                                                                                                                                                                                                                                                                                                                                                                                                                                                                                                                                                                                                                                                                                                                                                          |                                                                                                                                                                                                                                                                                                                                                                                                              |                      |                     |                    |                          |                          |                          |  |  |  |                                                                     |  |  |  |  |                                                                  |  |  |  |  |         |  |  |  |  |                                    |  |  |  |  |                   |  |  |  |  |                             |  |  |  |  |       |  |  |  |  |                     |  |  |  |  |     |  |  |  |  |               |  |  |  |  |             |  |  |  |  |                                                      |  |  |  |  |                         |  |  |  |  |
| HIV                                                                 |                                                                                                                                                                                                                                                                                                                                                                                                                                                                                                                                                                                                                                                                                                                                                                                                                                                                                                                                                                                                                                                                                                                                                                                                                                                                                                                                                                                                                                                                                                                                                                                          |                                                                                                                                                                                                                                                                                                                                                                                                              |                      |                     |                    |                          |                          |                          |  |  |  |                                                                     |  |  |  |  |                                                                  |  |  |  |  |         |  |  |  |  |                                    |  |  |  |  |                   |  |  |  |  |                             |  |  |  |  |       |  |  |  |  |                     |  |  |  |  |     |  |  |  |  |               |  |  |  |  |             |  |  |  |  |                                                      |  |  |  |  |                         |  |  |  |  |
| Henipaviruses                                                       |                                                                                                                                                                                                                                                                                                                                                                                                                                                                                                                                                                                                                                                                                                                                                                                                                                                                                                                                                                                                                                                                                                                                                                                                                                                                                                                                                                                                                                                                                                                                                                                          |                                                                                                                                                                                                                                                                                                                                                                                                              |                      |                     |                    |                          |                          |                          |  |  |  |                                                                     |  |  |  |  |                                                                  |  |  |  |  |         |  |  |  |  |                                    |  |  |  |  |                   |  |  |  |  |                             |  |  |  |  |       |  |  |  |  |                     |  |  |  |  |     |  |  |  |  |               |  |  |  |  |             |  |  |  |  |                                                      |  |  |  |  |                         |  |  |  |  |
| Arboviruses                                                         |                                                                                                                                                                                                                                                                                                                                                                                                                                                                                                                                                                                                                                                                                                                                                                                                                                                                                                                                                                                                                                                                                                                                                                                                                                                                                                                                                                                                                                                                                                                                                                                          |                                                                                                                                                                                                                                                                                                                                                                                                              |                      |                     |                    |                          |                          |                          |  |  |  |                                                                     |  |  |  |  |                                                                  |  |  |  |  |         |  |  |  |  |                                    |  |  |  |  |                   |  |  |  |  |                             |  |  |  |  |       |  |  |  |  |                     |  |  |  |  |     |  |  |  |  |               |  |  |  |  |             |  |  |  |  |                                                      |  |  |  |  |                         |  |  |  |  |
| Viral hemorrhagic fevers (Filoviruses/ arenaviruses)                |                                                                                                                                                                                                                                                                                                                                                                                                                                                                                                                                                                                                                                                                                                                                                                                                                                                                                                                                                                                                                                                                                                                                                                                                                                                                                                                                                                                                                                                                                                                                                                                          |                                                                                                                                                                                                                                                                                                                                                                                                              |                      |                     |                    |                          |                          |                          |  |  |  |                                                                     |  |  |  |  |                                                                  |  |  |  |  |         |  |  |  |  |                                    |  |  |  |  |                   |  |  |  |  |                             |  |  |  |  |       |  |  |  |  |                     |  |  |  |  |     |  |  |  |  |               |  |  |  |  |             |  |  |  |  |                                                      |  |  |  |  |                         |  |  |  |  |
| Others (Please specify)                                             |                                                                                                                                                                                                                                                                                                                                                                                                                                                                                                                                                                                                                                                                                                                                                                                                                                                                                                                                                                                                                                                                                                                                                                                                                                                                                                                                                                                                                                                                                                                                                                                          |                                                                                                                                                                                                                                                                                                                                                                                                              |                      |                     |                    |                          |                          |                          |  |  |  |                                                                     |  |  |  |  |                                                                  |  |  |  |  |         |  |  |  |  |                                    |  |  |  |  |                   |  |  |  |  |                             |  |  |  |  |       |  |  |  |  |                     |  |  |  |  |     |  |  |  |  |               |  |  |  |  |             |  |  |  |  |                                                      |  |  |  |  |                         |  |  |  |  |
| 2.1.5                                                               | <p>Is sequencing being performed in research or surveillance to detect unknown pathogens?</p>                                                                                                                                                                                                                                                                                                                                                                                                                                                                                                                                                                                                                                                                                                                                                                                                                                                                                                                                                                                                                                                                                                                                                                                                                                                                                                                                                                                                                                                                                            | <p><i>Select all that apply</i></p> <table border="1"> <thead> <tr> <th>Human</th> <th>Animal</th> <th>Environment</th> </tr> </thead> <tbody> <tr> <td><input type="checkbox"/></td> <td><input type="checkbox"/></td> <td><input type="checkbox"/></td> </tr> </tbody> </table>                                                                                                                            | Human                | Animal              | Environment        | <input type="checkbox"/> | <input type="checkbox"/> | <input type="checkbox"/> |  |  |  |                                                                     |  |  |  |  |                                                                  |  |  |  |  |         |  |  |  |  |                                    |  |  |  |  |                   |  |  |  |  |                             |  |  |  |  |       |  |  |  |  |                     |  |  |  |  |     |  |  |  |  |               |  |  |  |  |             |  |  |  |  |                                                      |  |  |  |  |                         |  |  |  |  |
| Human                                                               | Animal                                                                                                                                                                                                                                                                                                                                                                                                                                                                                                                                                                                                                                                                                                                                                                                                                                                                                                                                                                                                                                                                                                                                                                                                                                                                                                                                                                                                                                                                                                                                                                                   | Environment                                                                                                                                                                                                                                                                                                                                                                                                  |                      |                     |                    |                          |                          |                          |  |  |  |                                                                     |  |  |  |  |                                                                  |  |  |  |  |         |  |  |  |  |                                    |  |  |  |  |                   |  |  |  |  |                             |  |  |  |  |       |  |  |  |  |                     |  |  |  |  |     |  |  |  |  |               |  |  |  |  |             |  |  |  |  |                                                      |  |  |  |  |                         |  |  |  |  |
| <input type="checkbox"/>                                            | <input type="checkbox"/>                                                                                                                                                                                                                                                                                                                                                                                                                                                                                                                                                                                                                                                                                                                                                                                                                                                                                                                                                                                                                                                                                                                                                                                                                                                                                                                                                                                                                                                                                                                                                                 | <input type="checkbox"/>                                                                                                                                                                                                                                                                                                                                                                                     |                      |                     |                    |                          |                          |                          |  |  |  |                                                                     |  |  |  |  |                                                                  |  |  |  |  |         |  |  |  |  |                                    |  |  |  |  |                   |  |  |  |  |                             |  |  |  |  |       |  |  |  |  |                     |  |  |  |  |     |  |  |  |  |               |  |  |  |  |             |  |  |  |  |                                                      |  |  |  |  |                         |  |  |  |  |
| 2.1.6                                                               | <p>Is there a national research agenda or plan for additional use of pathogen genomics data other than for surveillance purposes?</p>                                                                                                                                                                                                                                                                                                                                                                                                                                                                                                                                                                                                                                                                                                                                                                                                                                                                                                                                                                                                                                                                                                                                                                                                                                                                                                                                                                                                                                                    | <p>Yes <input type="checkbox"/></p> <p>No <input type="checkbox"/></p>                                                                                                                                                                                                                                                                                                                                       |                      |                     |                    |                          |                          |                          |  |  |  |                                                                     |  |  |  |  |                                                                  |  |  |  |  |         |  |  |  |  |                                    |  |  |  |  |                   |  |  |  |  |                             |  |  |  |  |       |  |  |  |  |                     |  |  |  |  |     |  |  |  |  |               |  |  |  |  |             |  |  |  |  |                                                      |  |  |  |  |                         |  |  |  |  |
| 2.1.7                                                               | <p>What other applications is PGS data being used for in your country?</p>                                                                                                                                                                                                                                                                                                                                                                                                                                                                                                                                                                                                                                                                                                                                                                                                                                                                                                                                                                                                                                                                                                                                                                                                                                                                                                                                                                                                                                                                                                               | <p><i>Select all that apply:</i></p> <p><input type="checkbox"/> Development of molecular assays</p> <p><input type="checkbox"/> Functional immunology studies</p> <p><input type="checkbox"/> Development of therapeutics</p> <p><input type="checkbox"/> Evaluation of vaccine effectiveness</p> <p><input type="checkbox"/> For policy making</p> <p><input type="checkbox"/> Others (please specify)</p> |                      |                     |                    |                          |                          |                          |  |  |  |                                                                     |  |  |  |  |                                                                  |  |  |  |  |         |  |  |  |  |                                    |  |  |  |  |                   |  |  |  |  |                             |  |  |  |  |       |  |  |  |  |                     |  |  |  |  |     |  |  |  |  |               |  |  |  |  |             |  |  |  |  |                                                      |  |  |  |  |                         |  |  |  |  |

| Part 2.2: Guidelines & Standard Operating Procedures (SOPs)                                                                               |                                                                                                                                                                                                                                                                                                                                                                                                                                                                                                                                                                                                                                                                                                                                                                                       |                                                                                 |                                                            |                       |  |                                              |  |                    |  |                                  |  |                         |  |                                  |  |                                 |  |                           |  |                                         |  |                                   |  |  |
|-------------------------------------------------------------------------------------------------------------------------------------------|---------------------------------------------------------------------------------------------------------------------------------------------------------------------------------------------------------------------------------------------------------------------------------------------------------------------------------------------------------------------------------------------------------------------------------------------------------------------------------------------------------------------------------------------------------------------------------------------------------------------------------------------------------------------------------------------------------------------------------------------------------------------------------------|---------------------------------------------------------------------------------|------------------------------------------------------------|-----------------------|--|----------------------------------------------|--|--------------------|--|----------------------------------|--|-------------------------|--|----------------------------------|--|---------------------------------|--|---------------------------|--|-----------------------------------------|--|-----------------------------------|--|--|
| 2.2.1                                                                                                                                     | Are there in-country policy guidelines for public health surveillance using NGS?                                                                                                                                                                                                                                                                                                                                                                                                                                                                                                                                                                                                                                                                                                      | Yes <input type="checkbox"/><br>No <input type="checkbox"/> → Skip to 2.2.3     |                                                            |                       |  |                                              |  |                    |  |                                  |  |                         |  |                                  |  |                                 |  |                           |  |                                         |  |                                   |  |  |
| 2.2.2                                                                                                                                     | If yes, do they contain the following?                                                                                                                                                                                                                                                                                                                                                                                                                                                                                                                                                                                                                                                                                                                                                |                                                                                 |                                                            |                       |  |                                              |  |                    |  |                                  |  |                         |  |                                  |  |                                 |  |                           |  |                                         |  |                                   |  |  |
|                                                                                                                                           | <table border="1"> <tr> <td>Policy guidelines for NGS surveillance</td> <td>Scale: 1 (No guideline) - 5 (Guideline for all pathogens)*</td> </tr> <tr> <td>Sampling strategy</td> <td></td> </tr> <tr> <td>Interface with animal &amp; environmental health</td> <td></td> </tr> <tr> <td>Laboratory network</td> <td></td> </tr> <tr> <td>Metadata collection</td> <td></td> </tr> <tr> <td>Genome data sharing</td> <td></td> </tr> <tr> <td>Reporting to relevant Ministries</td> <td></td> </tr> <tr> <td>Reporting to other stakeholders</td> <td></td> </tr> <tr> <td>Data management &amp; storage</td> <td></td> </tr> <tr> <td>Sample tracking, inventory &amp; repository</td> <td></td> </tr> <tr> <td>Storage of reagents &amp; consumables</td> <td></td> </tr> </table> | Policy guidelines for NGS surveillance                                          | Scale: 1 (No guideline) - 5 (Guideline for all pathogens)* | Sampling strategy     |  | Interface with animal & environmental health |  | Laboratory network |  | Metadata collection              |  | Genome data sharing     |  | Reporting to relevant Ministries |  | Reporting to other stakeholders |  | Data management & storage |  | Sample tracking, inventory & repository |  | Storage of reagents & consumables |  |  |
| Policy guidelines for NGS surveillance                                                                                                    | Scale: 1 (No guideline) - 5 (Guideline for all pathogens)*                                                                                                                                                                                                                                                                                                                                                                                                                                                                                                                                                                                                                                                                                                                            |                                                                                 |                                                            |                       |  |                                              |  |                    |  |                                  |  |                         |  |                                  |  |                                 |  |                           |  |                                         |  |                                   |  |  |
| Sampling strategy                                                                                                                         |                                                                                                                                                                                                                                                                                                                                                                                                                                                                                                                                                                                                                                                                                                                                                                                       |                                                                                 |                                                            |                       |  |                                              |  |                    |  |                                  |  |                         |  |                                  |  |                                 |  |                           |  |                                         |  |                                   |  |  |
| Interface with animal & environmental health                                                                                              |                                                                                                                                                                                                                                                                                                                                                                                                                                                                                                                                                                                                                                                                                                                                                                                       |                                                                                 |                                                            |                       |  |                                              |  |                    |  |                                  |  |                         |  |                                  |  |                                 |  |                           |  |                                         |  |                                   |  |  |
| Laboratory network                                                                                                                        |                                                                                                                                                                                                                                                                                                                                                                                                                                                                                                                                                                                                                                                                                                                                                                                       |                                                                                 |                                                            |                       |  |                                              |  |                    |  |                                  |  |                         |  |                                  |  |                                 |  |                           |  |                                         |  |                                   |  |  |
| Metadata collection                                                                                                                       |                                                                                                                                                                                                                                                                                                                                                                                                                                                                                                                                                                                                                                                                                                                                                                                       |                                                                                 |                                                            |                       |  |                                              |  |                    |  |                                  |  |                         |  |                                  |  |                                 |  |                           |  |                                         |  |                                   |  |  |
| Genome data sharing                                                                                                                       |                                                                                                                                                                                                                                                                                                                                                                                                                                                                                                                                                                                                                                                                                                                                                                                       |                                                                                 |                                                            |                       |  |                                              |  |                    |  |                                  |  |                         |  |                                  |  |                                 |  |                           |  |                                         |  |                                   |  |  |
| Reporting to relevant Ministries                                                                                                          |                                                                                                                                                                                                                                                                                                                                                                                                                                                                                                                                                                                                                                                                                                                                                                                       |                                                                                 |                                                            |                       |  |                                              |  |                    |  |                                  |  |                         |  |                                  |  |                                 |  |                           |  |                                         |  |                                   |  |  |
| Reporting to other stakeholders                                                                                                           |                                                                                                                                                                                                                                                                                                                                                                                                                                                                                                                                                                                                                                                                                                                                                                                       |                                                                                 |                                                            |                       |  |                                              |  |                    |  |                                  |  |                         |  |                                  |  |                                 |  |                           |  |                                         |  |                                   |  |  |
| Data management & storage                                                                                                                 |                                                                                                                                                                                                                                                                                                                                                                                                                                                                                                                                                                                                                                                                                                                                                                                       |                                                                                 |                                                            |                       |  |                                              |  |                    |  |                                  |  |                         |  |                                  |  |                                 |  |                           |  |                                         |  |                                   |  |  |
| Sample tracking, inventory & repository                                                                                                   |                                                                                                                                                                                                                                                                                                                                                                                                                                                                                                                                                                                                                                                                                                                                                                                       |                                                                                 |                                                            |                       |  |                                              |  |                    |  |                                  |  |                         |  |                                  |  |                                 |  |                           |  |                                         |  |                                   |  |  |
| Storage of reagents & consumables                                                                                                         |                                                                                                                                                                                                                                                                                                                                                                                                                                                                                                                                                                                                                                                                                                                                                                                       |                                                                                 |                                                            |                       |  |                                              |  |                    |  |                                  |  |                         |  |                                  |  |                                 |  |                           |  |                                         |  |                                   |  |  |
| *Scale: (1 = No guideline, 2= Under development, 3= Exists for some pathogens, 4= Exists for most pathogens, 5= Exists for all pathogens) |                                                                                                                                                                                                                                                                                                                                                                                                                                                                                                                                                                                                                                                                                                                                                                                       |                                                                                 |                                                            |                       |  |                                              |  |                    |  |                                  |  |                         |  |                                  |  |                                 |  |                           |  |                                         |  |                                   |  |  |
| 2.2.3                                                                                                                                     | Are NGS laboratory guidelines and protocols for genomic surveillance and sequencing available for sharing across testing laboratories in country?                                                                                                                                                                                                                                                                                                                                                                                                                                                                                                                                                                                                                                     | Yes <input type="checkbox"/><br>No <input type="checkbox"/> → Skip to Section 3 |                                                            |                       |  |                                              |  |                    |  |                                  |  |                         |  |                                  |  |                                 |  |                           |  |                                         |  |                                   |  |  |
| 2.2.4                                                                                                                                     | If yes, do they contain SOPs for the following?                                                                                                                                                                                                                                                                                                                                                                                                                                                                                                                                                                                                                                                                                                                                       |                                                                                 |                                                            |                       |  |                                              |  |                    |  |                                  |  |                         |  |                                  |  |                                 |  |                           |  |                                         |  |                                   |  |  |
|                                                                                                                                           | <table border="1"> <tr> <td>NGS Laboratory guidelines and protocols</td> <td>Scale: 1 (No guideline) - 5 (Guideline for all pathogens)*</td> </tr> <tr> <td>Sample pre-processing</td> <td></td> </tr> <tr> <td>Library preparation</td> <td></td> </tr> <tr> <td>Sequencing</td> <td></td> </tr> <tr> <td>Data processing &amp; bioinformatics</td> <td></td> </tr> <tr> <td>Data analysis &amp; sharing</td> <td></td> </tr> </table>                                                                                                                                                                                                                                                                                                                                               | NGS Laboratory guidelines and protocols                                         | Scale: 1 (No guideline) - 5 (Guideline for all pathogens)* | Sample pre-processing |  | Library preparation                          |  | Sequencing         |  | Data processing & bioinformatics |  | Data analysis & sharing |  |                                  |  |                                 |  |                           |  |                                         |  |                                   |  |  |
| NGS Laboratory guidelines and protocols                                                                                                   | Scale: 1 (No guideline) - 5 (Guideline for all pathogens)*                                                                                                                                                                                                                                                                                                                                                                                                                                                                                                                                                                                                                                                                                                                            |                                                                                 |                                                            |                       |  |                                              |  |                    |  |                                  |  |                         |  |                                  |  |                                 |  |                           |  |                                         |  |                                   |  |  |
| Sample pre-processing                                                                                                                     |                                                                                                                                                                                                                                                                                                                                                                                                                                                                                                                                                                                                                                                                                                                                                                                       |                                                                                 |                                                            |                       |  |                                              |  |                    |  |                                  |  |                         |  |                                  |  |                                 |  |                           |  |                                         |  |                                   |  |  |
| Library preparation                                                                                                                       |                                                                                                                                                                                                                                                                                                                                                                                                                                                                                                                                                                                                                                                                                                                                                                                       |                                                                                 |                                                            |                       |  |                                              |  |                    |  |                                  |  |                         |  |                                  |  |                                 |  |                           |  |                                         |  |                                   |  |  |
| Sequencing                                                                                                                                |                                                                                                                                                                                                                                                                                                                                                                                                                                                                                                                                                                                                                                                                                                                                                                                       |                                                                                 |                                                            |                       |  |                                              |  |                    |  |                                  |  |                         |  |                                  |  |                                 |  |                           |  |                                         |  |                                   |  |  |
| Data processing & bioinformatics                                                                                                          |                                                                                                                                                                                                                                                                                                                                                                                                                                                                                                                                                                                                                                                                                                                                                                                       |                                                                                 |                                                            |                       |  |                                              |  |                    |  |                                  |  |                         |  |                                  |  |                                 |  |                           |  |                                         |  |                                   |  |  |
| Data analysis & sharing                                                                                                                   |                                                                                                                                                                                                                                                                                                                                                                                                                                                                                                                                                                                                                                                                                                                                                                                       |                                                                                 |                                                            |                       |  |                                              |  |                    |  |                                  |  |                         |  |                                  |  |                                 |  |                           |  |                                         |  |                                   |  |  |
| *Scale: (1 = No guideline, 2= Under development, 3= Exists for some pathogens, 4= Exists for most pathogens, 5= Exists for all pathogens) |                                                                                                                                                                                                                                                                                                                                                                                                                                                                                                                                                                                                                                                                                                                                                                                       |                                                                                 |                                                            |                       |  |                                              |  |                    |  |                                  |  |                         |  |                                  |  |                                 |  |                           |  |                                         |  |                                   |  |  |

| Section 3: Infrastructure & Supply Chain Management |                                                                                                                                                             |                                                                                                                                                                |
|-----------------------------------------------------|-------------------------------------------------------------------------------------------------------------------------------------------------------------|----------------------------------------------------------------------------------------------------------------------------------------------------------------|
| Part 3.1: Laboratory availability                   |                                                                                                                                                             |                                                                                                                                                                |
| 3.1.1                                               | Number of laboratories in the country performing NGS for pathogen genomic surveillance.                                                                     | Laboratories performing NGS = Number                                                                                                                           |
| 3.1.2                                               | What is the total number of laboratories in country performing NGS for public health surveillance? Of the total, what is the breakdown by institution type? | Laboratories performing NGS for public health surveillance = Number<br><br>- Public = Number<br>- Academic = Number<br>- Private = Number<br>- Others = Number |



**Part 3.3: Sequencing Equipment**

| 3.3.1                                                               | Which platform(s) are used for pathogen genomic surveillance in country?                                                                                                                                                                                                                                                                                                                                                                                                                                                                                                                                                                                                       |                                    |        |                                    |                   |  |  |                                                               |  |  |                                                                     |  |  |                                              |  |  |                                    |  |  |                         |  |  |
|---------------------------------------------------------------------|--------------------------------------------------------------------------------------------------------------------------------------------------------------------------------------------------------------------------------------------------------------------------------------------------------------------------------------------------------------------------------------------------------------------------------------------------------------------------------------------------------------------------------------------------------------------------------------------------------------------------------------------------------------------------------|------------------------------------|--------|------------------------------------|-------------------|--|--|---------------------------------------------------------------|--|--|---------------------------------------------------------------------|--|--|----------------------------------------------|--|--|------------------------------------|--|--|-------------------------|--|--|
|                                                                     | <table border="1"> <thead> <tr> <th>Sequencing Platforms</th> <th>Number</th> <th>Performing at full capacity? (Y/N)</th> </tr> </thead> <tbody> <tr> <td>Sanger sequencing</td> <td></td> <td></td> </tr> <tr> <td>Illumina (e.g. iSeq, MiniSeq, MiSeq, NextSeq, HiSeq, NovaSeq)</td> <td></td> <td></td> </tr> <tr> <td>Oxford Nanopore Technologies (Flongle, MinION, GridION, PromethION)</td> <td></td> <td></td> </tr> <tr> <td>Thermo Fisher (e.g. Genexus, Ion GeneStudio)</td> <td></td> <td></td> </tr> <tr> <td>MGI/BGI (e.g. DNBSQ-G50/G-400/T-7)</td> <td></td> <td></td> </tr> <tr> <td>Others (please specify)</td> <td></td> <td></td> </tr> </tbody> </table> | Sequencing Platforms               | Number | Performing at full capacity? (Y/N) | Sanger sequencing |  |  | Illumina (e.g. iSeq, MiniSeq, MiSeq, NextSeq, HiSeq, NovaSeq) |  |  | Oxford Nanopore Technologies (Flongle, MinION, GridION, PromethION) |  |  | Thermo Fisher (e.g. Genexus, Ion GeneStudio) |  |  | MGI/BGI (e.g. DNBSQ-G50/G-400/T-7) |  |  | Others (please specify) |  |  |
| Sequencing Platforms                                                | Number                                                                                                                                                                                                                                                                                                                                                                                                                                                                                                                                                                                                                                                                         | Performing at full capacity? (Y/N) |        |                                    |                   |  |  |                                                               |  |  |                                                                     |  |  |                                              |  |  |                                    |  |  |                         |  |  |
| Sanger sequencing                                                   |                                                                                                                                                                                                                                                                                                                                                                                                                                                                                                                                                                                                                                                                                |                                    |        |                                    |                   |  |  |                                                               |  |  |                                                                     |  |  |                                              |  |  |                                    |  |  |                         |  |  |
| Illumina (e.g. iSeq, MiniSeq, MiSeq, NextSeq, HiSeq, NovaSeq)       |                                                                                                                                                                                                                                                                                                                                                                                                                                                                                                                                                                                                                                                                                |                                    |        |                                    |                   |  |  |                                                               |  |  |                                                                     |  |  |                                              |  |  |                                    |  |  |                         |  |  |
| Oxford Nanopore Technologies (Flongle, MinION, GridION, PromethION) |                                                                                                                                                                                                                                                                                                                                                                                                                                                                                                                                                                                                                                                                                |                                    |        |                                    |                   |  |  |                                                               |  |  |                                                                     |  |  |                                              |  |  |                                    |  |  |                         |  |  |
| Thermo Fisher (e.g. Genexus, Ion GeneStudio)                        |                                                                                                                                                                                                                                                                                                                                                                                                                                                                                                                                                                                                                                                                                |                                    |        |                                    |                   |  |  |                                                               |  |  |                                                                     |  |  |                                              |  |  |                                    |  |  |                         |  |  |
| MGI/BGI (e.g. DNBSQ-G50/G-400/T-7)                                  |                                                                                                                                                                                                                                                                                                                                                                                                                                                                                                                                                                                                                                                                                |                                    |        |                                    |                   |  |  |                                                               |  |  |                                                                     |  |  |                                              |  |  |                                    |  |  |                         |  |  |
| Others (please specify)                                             |                                                                                                                                                                                                                                                                                                                                                                                                                                                                                                                                                                                                                                                                                |                                    |        |                                    |                   |  |  |                                                               |  |  |                                                                     |  |  |                                              |  |  |                                    |  |  |                         |  |  |

**Part 3.2: Laboratory capacity**

|        |                                                                                                                                                                             |                                                                                                                                                                                                                                             |
|--------|-----------------------------------------------------------------------------------------------------------------------------------------------------------------------------|---------------------------------------------------------------------------------------------------------------------------------------------------------------------------------------------------------------------------------------------|
| 3.2.1  | What is the highest biosafety level (BSL) laboratory available in country?                                                                                                  | BSL 1<br>BSL 2<br>BSL 3 → provide number<br>BSL 4 → provide number                                                                                                                                                                          |
| 3.2.2  | Are there national biosafety regulations governing use and access to BSL 3 and BSL 4 agents?                                                                                | <input type="checkbox"/> Yes<br><input type="checkbox"/> No → skip to 3.2.5                                                                                                                                                                 |
| 3.2.3  | If yes, are there provisions to access materials for sequencing?                                                                                                            | Yes<br>No                                                                                                                                                                                                                                   |
| 3.2.4  | If yes, which protocols exist?                                                                                                                                              | <i>Select all that apply:</i><br><input type="checkbox"/> NGS performed in BSL2 on verified inactivated BSL3 or BSL4 pathogens.<br><input type="checkbox"/> NGS performed within BSL3<br><input type="checkbox"/> NGS performed within BSL4 |
| 3.2.5  | What is the <b>maximum monthly sequencing</b> capacity (number of sequencing reactions) for all laboratories conducting NGS for pathogen genomic surveillance?              | <i>Provide a maximum number (X) of sequencing reactions that can be done</i>                                                                                                                                                                |
| 3.2.6  | What is the <b>actual monthly sequencing</b> output on average?                                                                                                             | <i>Provide the average number (X) or a range, e.g.: 0, &lt;50, 100-200, 200 - 500, 500 - 1,000 and &gt;5,000</i>                                                                                                                            |
| 3.2.7  | What is the estimated time between specimen collection and sequencing for priority pathogens?                                                                               | <i>Number of days</i>                                                                                                                                                                                                                       |
| 3.2.8  | Is NGS bioinformatics (data processing) conducted in-country?                                                                                                               | <i>Scale 1 – 5<br/>(Never/Rarely/Sometimes/Often/Always)</i>                                                                                                                                                                                |
| 3.2.9  | How long does data processing usually take per NGS run?<br><br><i>This refers to the time taken to analyse raw sequencing data for final consensus sequence generation.</i> | <i>Number of days</i>                                                                                                                                                                                                                       |
| 3.2.10 | What is the estimated time between sequence generation and reporting to government (if applicable)?                                                                         | <i>Number of days</i>                                                                                                                                                                                                                       |



| Part 3.4: Supply Chain Management |                                                                                                                                                                      |                                                |                            |                                                             |                                                                   |                                                                             |                                                                                  |                                             |                                     |           |
|-----------------------------------|----------------------------------------------------------------------------------------------------------------------------------------------------------------------|------------------------------------------------|----------------------------|-------------------------------------------------------------|-------------------------------------------------------------------|-----------------------------------------------------------------------------|----------------------------------------------------------------------------------|---------------------------------------------|-------------------------------------|-----------|
| Sequencing platform: Sanger       |                                                                                                                                                                      |                                                |                            |                                                             |                                                                   |                                                                             |                                                                                  |                                             |                                     |           |
| 3.4.1a                            | Where do you purchase these components from?                                                                                                                         | Direct from manufacturers                      |                            | Distributors<br><i>Please list down name of distributor</i> |                                                                   |                                                                             | Group purchasing organisations (e.g., UNICEF)/collaborators                      |                                             | Others (please specify)             |           |
|                                   |                                                                                                                                                                      | In country (Y/N)                               | External (specify country) | In country (List, eg: Company A)                            | External (Company A, Country X)                                   |                                                                             |                                                                                  |                                             |                                     |           |
|                                   | Sequencing machine & related equipment                                                                                                                               |                                                |                            |                                                             |                                                                   |                                                                             |                                                                                  |                                             |                                     |           |
|                                   | Reagents                                                                                                                                                             |                                                |                            |                                                             |                                                                   |                                                                             |                                                                                  |                                             |                                     |           |
|                                   | Non-reagent consumables                                                                                                                                              |                                                |                            |                                                             |                                                                   |                                                                             |                                                                                  |                                             |                                     |           |
| 3.4.2a                            | Is the procurement process centrally coordinated by the public health entity in charge of genomic surveillance and sequencing or conducted by individual facilities? |                                                |                            |                                                             |                                                                   | (Central / By individual facilities)                                        |                                                                                  |                                             |                                     |           |
| 3.4.3a                            | Is the supply forecasting process centrally coordinated or conducted by individual facilities?                                                                       |                                                |                            |                                                             |                                                                   | (Central / By individual facilities)                                        |                                                                                  |                                             |                                     |           |
| 3.4.4a                            | Have there been any breakdown of sequencing equipment in the past 6 months?                                                                                          |                                                |                            |                                                             |                                                                   | Yes <input type="checkbox"/><br>No <input type="checkbox"/>                 |                                                                                  |                                             |                                     |           |
| 3.4.5a                            | Does the country face supply chain constraints for sequencing-related equipment or reagents?                                                                         |                                                |                            |                                                             |                                                                   | Yes <input type="checkbox"/><br>No <input type="checkbox"/> → Skip to 3.4.7 |                                                                                  |                                             |                                     |           |
| 3.4.6a                            | If yes, which supply chain components are a barrier to sequencing capacity?                                                                                          | Distributor responsiveness / technical support | Customs clearance          | Cold chain maintenance                                      | Equipment purchasing lead time (time taken from order to arrival) | Equipment repair lead time (time taken from repair to full function)        | Reagents and consumables purchasing lead time (time taken from order to arrival) | Reagents and consumables stock availability | Expiry date on arrival for reagents |           |
|                                   |                                                                                                                                                                      | 1 2 3 4 5                                      | 1 2 3 4 5                  | 1 2 3 4 5                                                   | 1 2 3 4 5                                                         | 1 2 3 4 5                                                                   | 1 2 3 4 5                                                                        | 1 2 3 4 5                                   | 1 2 3 4 5                           | 1 2 3 4 5 |
|                                   | <i>1 Not a barrier, 2 Rarely a barrier, 3 Sometimes a barrier, 4 Often a barrier, 5 Always a barrier</i>                                                             |                                                |                            |                                                             |                                                                   |                                                                             |                                                                                  |                                             |                                     |           |
| 3.4.7a                            | What is the average re-supply time between order and receipt at the laboratory for:                                                                                  |                                                |                            |                                                             |                                                                   | Reagents: ____ weeks                                                        |                                                                                  | Consumables: ____ weeks                     |                                     |           |
| 3.4.8a                            | In the past 6 months have reagents/consumables stock outputs for this platform been a challenge?                                                                     |                                                |                            |                                                             |                                                                   | Scale 1-5 (least challenging to very challenging)<br>1 2 3 4 5              |                                                                                  |                                             |                                     |           |

| Part 3.4: Supply Chain Management    |                                                                                                                                                                      |                                                |                            |                                                             |                                                                   |                                                                             |                                                                                  |                                             |                                     |           |
|--------------------------------------|----------------------------------------------------------------------------------------------------------------------------------------------------------------------|------------------------------------------------|----------------------------|-------------------------------------------------------------|-------------------------------------------------------------------|-----------------------------------------------------------------------------|----------------------------------------------------------------------------------|---------------------------------------------|-------------------------------------|-----------|
| Sequencing platform: <b>Illumina</b> |                                                                                                                                                                      |                                                |                            |                                                             |                                                                   |                                                                             |                                                                                  |                                             |                                     |           |
| 3.4.1a                               | Where do you purchase these components from?                                                                                                                         | Direct from manufacturers                      |                            | Distributors<br><i>Please list down name of distributor</i> |                                                                   |                                                                             | Group purchasing organisations (e.g., UNICEF)/collaborators                      |                                             | Others (please specify)             |           |
|                                      |                                                                                                                                                                      | In country (Y/N)                               | External (specify country) | In country (List, eg: Company A)                            | External (Company A, Country X)                                   |                                                                             |                                                                                  |                                             |                                     |           |
|                                      | Sequencing machine & related equipment                                                                                                                               |                                                |                            |                                                             |                                                                   |                                                                             |                                                                                  |                                             |                                     |           |
|                                      | Reagents                                                                                                                                                             |                                                |                            |                                                             |                                                                   |                                                                             |                                                                                  |                                             |                                     |           |
|                                      | Non-reagent consumables                                                                                                                                              |                                                |                            |                                                             |                                                                   |                                                                             |                                                                                  |                                             |                                     |           |
| 3.4.2a                               | Is the procurement process centrally coordinated by the public health entity in charge of genomic surveillance and sequencing or conducted by individual facilities? |                                                |                            |                                                             |                                                                   | (Central / By individual facilities)                                        |                                                                                  |                                             |                                     |           |
| 3.4.3a                               | Is the supply forecasting process centrally coordinated or conducted by individual facilities?                                                                       |                                                |                            |                                                             |                                                                   | (Central / By individual facilities)                                        |                                                                                  |                                             |                                     |           |
| 3.4.4a                               | Have there been any breakdown of sequencing equipment in the past 6 months?                                                                                          |                                                |                            |                                                             |                                                                   | Yes <input type="checkbox"/><br>No <input type="checkbox"/>                 |                                                                                  |                                             |                                     |           |
| 3.4.5a                               | Does the country face supply chain constraints for sequencing-related equipment or reagents?                                                                         |                                                |                            |                                                             |                                                                   | Yes <input type="checkbox"/><br>No <input type="checkbox"/> → Skip to 3.4.7 |                                                                                  |                                             |                                     |           |
| 3.4.6a                               | If yes, which supply chain components are a barrier to sequencing capacity?                                                                                          | Distributor responsiveness / technical support | Customs clearance          | Cold chain maintenance                                      | Equipment purchasing lead time (time taken from order to arrival) | Equipment repair lead time (time taken from repair to full function)        | Reagents and consumables purchasing lead time (time taken from order to arrival) | Reagents and consumables stock availability | Expiry date on arrival for reagents |           |
|                                      |                                                                                                                                                                      | 1 2 3 4 5                                      | 1 2 3 4 5                  | 1 2 3 4 5                                                   | 1 2 3 4 5                                                         | 1 2 3 4 5                                                                   | 1 2 3 4 5                                                                        | 1 2 3 4 5                                   | 1 2 3 4 5                           | 1 2 3 4 5 |
|                                      | <i>1 Not a barrier, 2 Rarely a barrier, 3 Sometimes a barrier, 4 Often a barrier, 5 Always a barrier</i>                                                             |                                                |                            |                                                             |                                                                   |                                                                             |                                                                                  |                                             |                                     |           |
| 3.4.7a                               | What is the average re-supply time between order and receipt at the laboratory for:                                                                                  |                                                |                            |                                                             |                                                                   | Reagents: ____ weeks                                                        |                                                                                  | Consumables: ____ weeks                     |                                     |           |
| 3.4.8a                               | In the past 6 months have reagents/consumables stock outputs for this platform been a challenge?                                                                     |                                                |                            |                                                             |                                                                   | Scale 1-5 (least challenging to very challenging)<br>1 2 3 4 5              |                                                                                  |                                             |                                     |           |

| Part 3.4: Supply Chain Management                        |                                                                                                                                                                      |                                                |                            |                                                             |                                                                   |                                                                             |                                                                                  |                                             |                                     |  |
|----------------------------------------------------------|----------------------------------------------------------------------------------------------------------------------------------------------------------------------|------------------------------------------------|----------------------------|-------------------------------------------------------------|-------------------------------------------------------------------|-----------------------------------------------------------------------------|----------------------------------------------------------------------------------|---------------------------------------------|-------------------------------------|--|
| Sequencing platform: <b>Oxford Nanopore Technologies</b> |                                                                                                                                                                      |                                                |                            |                                                             |                                                                   |                                                                             |                                                                                  |                                             |                                     |  |
| 3.4.1a                                                   | Where do you purchase these components from?                                                                                                                         | Direct from manufacturers                      |                            | Distributors<br><i>Please list down name of distributor</i> |                                                                   | Group purchasing organisations (e.g., UNICEF)/collaborators                 |                                                                                  | Others (please specify)                     |                                     |  |
|                                                          |                                                                                                                                                                      | In country (Y/N)                               | External (specify country) | In country (List, eg: Company A)                            | External (Company A, Country X)                                   |                                                                             |                                                                                  |                                             |                                     |  |
|                                                          | Sequencing machine & related equipment                                                                                                                               |                                                |                            |                                                             |                                                                   |                                                                             |                                                                                  |                                             |                                     |  |
|                                                          | Reagents                                                                                                                                                             |                                                |                            |                                                             |                                                                   |                                                                             |                                                                                  |                                             |                                     |  |
|                                                          | Non-reagent consumables                                                                                                                                              |                                                |                            |                                                             |                                                                   |                                                                             |                                                                                  |                                             |                                     |  |
| 3.4.2a                                                   | Is the procurement process centrally coordinated by the public health entity in charge of genomic surveillance and sequencing or conducted by individual facilities? |                                                |                            |                                                             |                                                                   | (Central / By individual facilities)                                        |                                                                                  |                                             |                                     |  |
| 3.4.3a                                                   | Is the supply forecasting process centrally coordinated or conducted by individual facilities?                                                                       |                                                |                            |                                                             |                                                                   | (Central / By individual facilities)                                        |                                                                                  |                                             |                                     |  |
| 3.4.4a                                                   | Have there been any breakdown of sequencing equipment in the past 6 months?                                                                                          |                                                |                            |                                                             |                                                                   | Yes <input type="checkbox"/><br>No <input type="checkbox"/>                 |                                                                                  |                                             |                                     |  |
| 3.4.5a                                                   | Does the country face supply chain constraints for sequencing-related equipment or reagents?                                                                         |                                                |                            |                                                             |                                                                   | Yes <input type="checkbox"/><br>No <input type="checkbox"/> → Skip to 3.4.7 |                                                                                  |                                             |                                     |  |
| 3.4.6a                                                   | If yes, which supply chain components are a barrier to sequencing capacity?                                                                                          | Distributor responsiveness / technical support | Customs clearance          | Cold chain maintenance                                      | Equipment purchasing lead time (time taken from order to arrival) | Equipment repair lead time (time taken from repair to full function)        | Reagents and consumables purchasing lead time (time taken from order to arrival) | Reagents and consumables stock availability | Expiry date on arrival for reagents |  |
|                                                          |                                                                                                                                                                      | 1 2 3 4 5                                      | 1 2 3 4 5                  | 1 2 3 4 5                                                   | 1 2 3 4 5                                                         | 1 2 3 4 5                                                                   | 1 2 3 4 5                                                                        | 1 2 3 4 5                                   | 1 2 3 4 5                           |  |
|                                                          | <i>1 Not a barrier, 2 Rarely a barrier, 3 Sometimes a barrier, 4 Often a barrier, 5 Always a barrier</i>                                                             |                                                |                            |                                                             |                                                                   |                                                                             |                                                                                  |                                             |                                     |  |
| 3.4.7a                                                   | What is the average re-supply time between order and receipt at the laboratory for:                                                                                  |                                                |                            |                                                             |                                                                   | Reagents: ____ weeks                                                        |                                                                                  | Consumables: ____ weeks                     |                                     |  |
| 3.4.8a                                                   | In the past 6 months have reagents/consumables stock outputs for this platform been a challenge?                                                                     |                                                |                            |                                                             |                                                                   | Scale 1-5 (least challenging to very challenging)<br>1 2 3 4 5              |                                                                                  |                                             |                                     |  |

| Part 3.4: Supply Chain Management         |                                                                                                                                                                      |                                                |                            |                                                             |                                                                   |                                                                             |                                                                                  |                                             |                                     |  |
|-------------------------------------------|----------------------------------------------------------------------------------------------------------------------------------------------------------------------|------------------------------------------------|----------------------------|-------------------------------------------------------------|-------------------------------------------------------------------|-----------------------------------------------------------------------------|----------------------------------------------------------------------------------|---------------------------------------------|-------------------------------------|--|
| Sequencing platform: <b>ThermoFischer</b> |                                                                                                                                                                      |                                                |                            |                                                             |                                                                   |                                                                             |                                                                                  |                                             |                                     |  |
| 3.4.1a                                    | Where do you purchase these components from?                                                                                                                         | Direct from manufacturers                      |                            | Distributors<br><i>Please list down name of distributor</i> |                                                                   | Group purchasing organisations (e.g., UNICEF)/collaborators                 |                                                                                  | Others (please specify)                     |                                     |  |
|                                           |                                                                                                                                                                      | In country (Y/N)                               | External (specify country) | In country (List, eg: Company A)                            | External (Company A, Country X)                                   |                                                                             |                                                                                  |                                             |                                     |  |
|                                           | Sequencing machine & related equipment                                                                                                                               |                                                |                            |                                                             |                                                                   |                                                                             |                                                                                  |                                             |                                     |  |
|                                           | Reagents                                                                                                                                                             |                                                |                            |                                                             |                                                                   |                                                                             |                                                                                  |                                             |                                     |  |
|                                           | Non-reagent consumables                                                                                                                                              |                                                |                            |                                                             |                                                                   |                                                                             |                                                                                  |                                             |                                     |  |
| 3.4.2a                                    | Is the procurement process centrally coordinated by the public health entity in charge of genomic surveillance and sequencing or conducted by individual facilities? |                                                |                            |                                                             |                                                                   | (Central / By individual facilities)                                        |                                                                                  |                                             |                                     |  |
| 3.4.3a                                    | Is the supply forecasting process centrally coordinated or conducted by individual facilities?                                                                       |                                                |                            |                                                             |                                                                   | (Central / By individual facilities)                                        |                                                                                  |                                             |                                     |  |
| 3.4.4a                                    | Have there been any breakdown of sequencing equipment in the past 6 months?                                                                                          |                                                |                            |                                                             |                                                                   | Yes <input type="checkbox"/><br>No <input type="checkbox"/>                 |                                                                                  |                                             |                                     |  |
| 3.4.5a                                    | Does the country face supply chain constraints for sequencing-related equipment or reagents?                                                                         |                                                |                            |                                                             |                                                                   | Yes <input type="checkbox"/><br>No <input type="checkbox"/> → Skip to 3.4.7 |                                                                                  |                                             |                                     |  |
| 3.4.6a                                    | If yes, which supply chain components are a barrier to sequencing capacity?                                                                                          | Distributor responsiveness / technical support | Customs clearance          | Cold chain maintenance                                      | Equipment purchasing lead time (time taken from order to arrival) | Equipment repair lead time (time taken from repair to full function)        | Reagents and consumables purchasing lead time (time taken from order to arrival) | Reagents and consumables stock availability | Expiry date on arrival for reagents |  |
|                                           |                                                                                                                                                                      | 1 2 3 4 5                                      | 1 2 3 4 5                  | 1 2 3 4 5                                                   | 1 2 3 4 5                                                         | 1 2 3 4 5                                                                   | 1 2 3 4 5                                                                        | 1 2 3 4 5                                   | 1 2 3 4 5                           |  |
|                                           | <i>1 Not a barrier, 2 Rarely a barrier, 3 Sometimes a barrier, 4 Often a barrier, 5 Always a barrier</i>                                                             |                                                |                            |                                                             |                                                                   |                                                                             |                                                                                  |                                             |                                     |  |
| 3.4.7a                                    | What is the average re-supply time between order and receipt at the laboratory for:                                                                                  |                                                |                            |                                                             |                                                                   | Reagents: ____ weeks                                                        |                                                                                  | Consumables: ____ weeks                     |                                     |  |
| 3.4.8a                                    | In the past 6 months have reagents/consumables stock outputs for this platform been a challenge?                                                                     |                                                |                            |                                                             |                                                                   | Scale 1-5 (least challenging to very challenging)<br>1 2 3 4 5              |                                                                                  |                                             |                                     |  |

| Part 3.4: Supply Chain Management |                                                                                                                                                                      |                                                |                            |                                                             |                                                                   |                                                                             |                                                                                  |                                             |                                     |           |
|-----------------------------------|----------------------------------------------------------------------------------------------------------------------------------------------------------------------|------------------------------------------------|----------------------------|-------------------------------------------------------------|-------------------------------------------------------------------|-----------------------------------------------------------------------------|----------------------------------------------------------------------------------|---------------------------------------------|-------------------------------------|-----------|
| Sequencing platform: <b>MGI</b>   |                                                                                                                                                                      |                                                |                            |                                                             |                                                                   |                                                                             |                                                                                  |                                             |                                     |           |
| 3.4.1a                            | Where do you purchase these components from?                                                                                                                         | Direct from manufacturers                      |                            | Distributors<br><i>Please list down name of distributor</i> |                                                                   |                                                                             | Group purchasing organisations (e.g., UNICEF)/collaborators                      |                                             | Others (please specify)             |           |
|                                   |                                                                                                                                                                      | In country (Y/N)                               | External (specify country) | In country (List, eg: Company A)                            | External (Company A, Country X)                                   |                                                                             |                                                                                  |                                             |                                     |           |
|                                   | Sequencing machine & related equipment                                                                                                                               |                                                |                            |                                                             |                                                                   |                                                                             |                                                                                  |                                             |                                     |           |
|                                   | Reagents                                                                                                                                                             |                                                |                            |                                                             |                                                                   |                                                                             |                                                                                  |                                             |                                     |           |
|                                   | Non-reagent consumables                                                                                                                                              |                                                |                            |                                                             |                                                                   |                                                                             |                                                                                  |                                             |                                     |           |
| 3.4.2a                            | Is the procurement process centrally coordinated by the public health entity in charge of genomic surveillance and sequencing or conducted by individual facilities? |                                                |                            |                                                             |                                                                   | (Central / By individual facilities)                                        |                                                                                  |                                             |                                     |           |
| 3.4.3a                            | Is the supply forecasting process centrally coordinated or conducted by individual facilities?                                                                       |                                                |                            |                                                             |                                                                   | (Central / By individual facilities)                                        |                                                                                  |                                             |                                     |           |
| 3.4.4a                            | Have there been any breakdown of sequencing equipment in the past 6 months?                                                                                          |                                                |                            |                                                             |                                                                   | Yes <input type="checkbox"/><br>No <input type="checkbox"/>                 |                                                                                  |                                             |                                     |           |
| 3.4.5a                            | Does the country face supply chain constraints for sequencing-related equipment or reagents?                                                                         |                                                |                            |                                                             |                                                                   | Yes <input type="checkbox"/><br>No <input type="checkbox"/> → Skip to 3.4.7 |                                                                                  |                                             |                                     |           |
| 3.4.6a                            | If yes, which supply chain components are a barrier to sequencing capacity?                                                                                          | Distributor responsiveness / technical support | Customs clearance          | Cold chain maintenance                                      | Equipment purchasing lead time (time taken from order to arrival) | Equipment repair lead time (time taken from repair to full function)        | Reagents and consumables purchasing lead time (time taken from order to arrival) | Reagents and consumables stock availability | Expiry date on arrival for reagents |           |
|                                   |                                                                                                                                                                      | 1 2 3 4 5                                      | 1 2 3 4 5                  | 1 2 3 4 5                                                   | 1 2 3 4 5                                                         | 1 2 3 4 5                                                                   | 1 2 3 4 5                                                                        | 1 2 3 4 5                                   | 1 2 3 4 5                           | 1 2 3 4 5 |
|                                   | <i>1 Not a barrier, 2 Rarely a barrier, 3 Sometimes a barrier, 4 Often a barrier, 5 Always a barrier</i>                                                             |                                                |                            |                                                             |                                                                   |                                                                             |                                                                                  |                                             |                                     |           |
| 3.4.7a                            | What is the average re-supply time between order and receipt at the laboratory for:                                                                                  |                                                |                            |                                                             |                                                                   | Reagents: ____ weeks                                                        |                                                                                  | Consumables: ____ weeks                     |                                     |           |
| 3.4.8a                            | In the past 6 months have reagents/consumables stock outputs for this platform been a challenge?                                                                     |                                                |                            |                                                             |                                                                   | Scale 1-5 (least challenging to very challenging)<br>1 2 3 4 5              |                                                                                  |                                             |                                     |           |

| Part 3.4: Supply Chain Management                                                            |                                                                                                                                                                      |                                                |                            |                                                             |                                                                   |                                                                             |                                                                                  |                                             |                                     |           |
|----------------------------------------------------------------------------------------------|----------------------------------------------------------------------------------------------------------------------------------------------------------------------|------------------------------------------------|----------------------------|-------------------------------------------------------------|-------------------------------------------------------------------|-----------------------------------------------------------------------------|----------------------------------------------------------------------------------|---------------------------------------------|-------------------------------------|-----------|
| Sequencing platform: <b>Other – please specify (Copy for additional platforms as needed)</b> |                                                                                                                                                                      |                                                |                            |                                                             |                                                                   |                                                                             |                                                                                  |                                             |                                     |           |
| 3.4.1a                                                                                       | Where do you purchase these components from?                                                                                                                         | Direct from manufacturers                      |                            | Distributors<br><i>Please list down name of distributor</i> |                                                                   |                                                                             | Group purchasing organisations (e.g., UNICEF)/collaborators                      |                                             | Others (please specify)             |           |
|                                                                                              |                                                                                                                                                                      | In country (Y/N)                               | External (specify country) | In country (List, eg: Company A)                            | External (Company A, Country X)                                   |                                                                             |                                                                                  |                                             |                                     |           |
|                                                                                              | Sequencing machine & related equipment                                                                                                                               |                                                |                            |                                                             |                                                                   |                                                                             |                                                                                  |                                             |                                     |           |
|                                                                                              | Reagents                                                                                                                                                             |                                                |                            |                                                             |                                                                   |                                                                             |                                                                                  |                                             |                                     |           |
|                                                                                              | Non-reagent consumables                                                                                                                                              |                                                |                            |                                                             |                                                                   |                                                                             |                                                                                  |                                             |                                     |           |
| 3.4.2a                                                                                       | Is the procurement process centrally coordinated by the public health entity in charge of genomic surveillance and sequencing or conducted by individual facilities? |                                                |                            |                                                             |                                                                   | (Central / By individual facilities)                                        |                                                                                  |                                             |                                     |           |
| 3.4.3a                                                                                       | Is the supply forecasting process centrally coordinated or conducted by individual facilities?                                                                       |                                                |                            |                                                             |                                                                   | (Central / By individual facilities)                                        |                                                                                  |                                             |                                     |           |
| 3.4.4a                                                                                       | Have there been any breakdown of sequencing equipment in the past 6 months?                                                                                          |                                                |                            |                                                             |                                                                   | Yes <input type="checkbox"/><br>No <input type="checkbox"/>                 |                                                                                  |                                             |                                     |           |
| 3.4.5a                                                                                       | Does the country face supply chain constraints for sequencing-related equipment or reagents?                                                                         |                                                |                            |                                                             |                                                                   | Yes <input type="checkbox"/><br>No <input type="checkbox"/> → Skip to 3.4.7 |                                                                                  |                                             |                                     |           |
| 3.4.6a                                                                                       | If yes, which supply chain components are a barrier to sequencing capacity?                                                                                          | Distributor responsiveness / technical support | Customs clearance          | Cold chain maintenance                                      | Equipment purchasing lead time (time taken from order to arrival) | Equipment repair lead time (time taken from repair to full function)        | Reagents and consumables purchasing lead time (time taken from order to arrival) | Reagents and consumables stock availability | Expiry date on arrival for reagents |           |
|                                                                                              |                                                                                                                                                                      | 1 2 3 4 5                                      | 1 2 3 4 5                  | 1 2 3 4 5                                                   | 1 2 3 4 5                                                         | 1 2 3 4 5                                                                   | 1 2 3 4 5                                                                        | 1 2 3 4 5                                   | 1 2 3 4 5                           | 1 2 3 4 5 |
|                                                                                              | <i>1 Not a barrier, 2 Rarely a barrier, 3 Sometimes a barrier, 4 Often a barrier, 5 Always a barrier</i>                                                             |                                                |                            |                                                             |                                                                   |                                                                             |                                                                                  |                                             |                                     |           |
| 3.4.7a                                                                                       | What is the average re-supply time between order and receipt at the laboratory for:                                                                                  |                                                |                            |                                                             |                                                                   | Reagents: ____ weeks                                                        |                                                                                  | Consumables: ____ weeks                     |                                     |           |
| 3.4.8a                                                                                       | In the past 6 months have reagents/consumables stock outputs for this platform been a challenge?                                                                     |                                                |                            |                                                             |                                                                   | Scale 1-5 (least challenging to very challenging)<br>1 2 3 4 5              |                                                                                  |                                             |                                     |           |



| Section 4: Performance, Quality and Feedback                                  |                                                                                                                                                                                                                                                                                                                                                                                                                                                                                                                                                                                                                                                                                                                                                                                                                                  |                                                                                                                                                                                             |                         |                           |                                                                            |  |                                                                               |  |                                  |  |                                                          |  |
|-------------------------------------------------------------------------------|----------------------------------------------------------------------------------------------------------------------------------------------------------------------------------------------------------------------------------------------------------------------------------------------------------------------------------------------------------------------------------------------------------------------------------------------------------------------------------------------------------------------------------------------------------------------------------------------------------------------------------------------------------------------------------------------------------------------------------------------------------------------------------------------------------------------------------|---------------------------------------------------------------------------------------------------------------------------------------------------------------------------------------------|-------------------------|---------------------------|----------------------------------------------------------------------------|--|-------------------------------------------------------------------------------|--|----------------------------------|--|----------------------------------------------------------|--|
| Part 4.1: Quality Management                                                  |                                                                                                                                                                                                                                                                                                                                                                                                                                                                                                                                                                                                                                                                                                                                                                                                                                  |                                                                                                                                                                                             |                         |                           |                                                                            |  |                                                                               |  |                                  |  |                                                          |  |
| 4.1.1                                                                         | <p>Is there a national laboratory quality assurance mechanism for governance of national laboratory quality?<br/><i>This question is intended to gauge in-country quality governance. Please answer "yes" even if current oversights do not cover NGS.</i></p>                                                                                                                                                                                                                                                                                                                                                                                                                                                                                                                                                                   | Yes <input type="checkbox"/><br>No <input type="checkbox"/>                                                                                                                                 |                         |                           |                                                                            |  |                                                                               |  |                                  |  |                                                          |  |
| 4.1.2                                                                         | <p>What proportion of laboratories conducting genomic surveillance and sequencing have been certified or accredited by any local or internationally recognized programs?<br/><i>This question is intended to gauge quality management systems within participating laboratories, regardless of whether NGS protocols are included in the list of accredited tests.</i></p>                                                                                                                                                                                                                                                                                                                                                                                                                                                       | % of laboratories<br><input type="checkbox"/> 0%<br><input type="checkbox"/> ≤25%<br><input type="checkbox"/> ≤50%<br><input type="checkbox"/> <75%<br><input type="checkbox"/> >75%        |                         |                           |                                                                            |  |                                                                               |  |                                  |  |                                                          |  |
| 4.1.3                                                                         | <p>Which of the following certification/accreditation standard(s) were used?<br/><i>(Select all that apply)</i></p> <input type="checkbox"/> College of American Pathologists (CAP)<br><input type="checkbox"/> International Organization for Standardization (ISO)<br><input type="checkbox"/> Clinical Laboratory Improvement Amendments (CLIA)<br><input type="checkbox"/> Good Laboratory Practice (GLP)<br><input type="checkbox"/> Others <i>(please specify)</i>                                                                                                                                                                                                                                                                                                                                                         |                                                                                                                                                                                             |                         |                           |                                                                            |  |                                                                               |  |                                  |  |                                                          |  |
| 4.1.4                                                                         | <p>How is patient data managed and how is this linked to resulting genomes?</p> <table border="1" style="width: 100%; border-collapse: collapse;"> <thead> <tr> <th style="background-color: #cccccc;">Patient data management</th> <th style="background-color: #cccccc;">Scale: 1 (0%) - 5 (&gt;75%)*</th> </tr> </thead> <tbody> <tr> <td>Fully integrated laboratory Information Management Systems (e.g. LIS/ LIM)</td> <td></td> </tr> <tr> <td>Partially integrated LIS/LIM with separate tagging and storage of genome data</td> <td></td> </tr> <tr> <td>Manual system (e.g. excel lists)</td> <td></td> </tr> <tr> <td>Genomic data is not currently tagged to patient metadata</td> <td></td> </tr> </tbody> </table> <p><i>Scale 1 – 5 (% of laboratories: 0%, ≤25%, ≤50%, &lt;75%, &gt;75%) for each option</i></p> |                                                                                                                                                                                             | Patient data management | Scale: 1 (0%) - 5 (>75%)* | Fully integrated laboratory Information Management Systems (e.g. LIS/ LIM) |  | Partially integrated LIS/LIM with separate tagging and storage of genome data |  | Manual system (e.g. excel lists) |  | Genomic data is not currently tagged to patient metadata |  |
| Patient data management                                                       | Scale: 1 (0%) - 5 (>75%)*                                                                                                                                                                                                                                                                                                                                                                                                                                                                                                                                                                                                                                                                                                                                                                                                        |                                                                                                                                                                                             |                         |                           |                                                                            |  |                                                                               |  |                                  |  |                                                          |  |
| Fully integrated laboratory Information Management Systems (e.g. LIS/ LIM)    |                                                                                                                                                                                                                                                                                                                                                                                                                                                                                                                                                                                                                                                                                                                                                                                                                                  |                                                                                                                                                                                             |                         |                           |                                                                            |  |                                                                               |  |                                  |  |                                                          |  |
| Partially integrated LIS/LIM with separate tagging and storage of genome data |                                                                                                                                                                                                                                                                                                                                                                                                                                                                                                                                                                                                                                                                                                                                                                                                                                  |                                                                                                                                                                                             |                         |                           |                                                                            |  |                                                                               |  |                                  |  |                                                          |  |
| Manual system (e.g. excel lists)                                              |                                                                                                                                                                                                                                                                                                                                                                                                                                                                                                                                                                                                                                                                                                                                                                                                                                  |                                                                                                                                                                                             |                         |                           |                                                                            |  |                                                                               |  |                                  |  |                                                          |  |
| Genomic data is not currently tagged to patient metadata                      |                                                                                                                                                                                                                                                                                                                                                                                                                                                                                                                                                                                                                                                                                                                                                                                                                                  |                                                                                                                                                                                             |                         |                           |                                                                            |  |                                                                               |  |                                  |  |                                                          |  |
| 4.1.5                                                                         | <p>What proportion of laboratories are estimated to have participated in any proficiency testing or external quality assurance audits for NGS?</p>                                                                                                                                                                                                                                                                                                                                                                                                                                                                                                                                                                                                                                                                               | <input type="checkbox"/> 0% → <i>If 0%, skip to 4.2</i><br><input type="checkbox"/> ≤25%<br><input type="checkbox"/> ≤50%<br><input type="checkbox"/> <75%<br><input type="checkbox"/> >75% |                         |                           |                                                                            |  |                                                                               |  |                                  |  |                                                          |  |
| 4.1.6                                                                         | <p>What proportion of these laboratories have a system to review results to enable corrective action?</p>                                                                                                                                                                                                                                                                                                                                                                                                                                                                                                                                                                                                                                                                                                                        | <input type="checkbox"/> 0%<br><input type="checkbox"/> ≤25%<br><input type="checkbox"/> ≤50%<br><input type="checkbox"/> <75%<br><input type="checkbox"/> >75%                             |                         |                           |                                                                            |  |                                                                               |  |                                  |  |                                                          |  |

| Part 4.2: Data sharing and Reporting                |                                                                                                                                                                                                                                                                                                                                                                                                                                                                                                                                                                                                                                                                                                                                                                                                                                                                   |                                                     |                                |                          |                 |                                   |  |                                         |                                |                          |           |                                   |  |
|-----------------------------------------------------|-------------------------------------------------------------------------------------------------------------------------------------------------------------------------------------------------------------------------------------------------------------------------------------------------------------------------------------------------------------------------------------------------------------------------------------------------------------------------------------------------------------------------------------------------------------------------------------------------------------------------------------------------------------------------------------------------------------------------------------------------------------------------------------------------------------------------------------------------------------------|-----------------------------------------------------|--------------------------------|--------------------------|-----------------|-----------------------------------|--|-----------------------------------------|--------------------------------|--------------------------|-----------|-----------------------------------|--|
| 4.2.1                                               | <p>What components of genomic surveillance and sequencing data has been shared (nationally/internationally) in the past year?</p> <p>Description:<br/>           1) <i>Genome sequence refers to the final .fasta obtained after bioinformatics analysis.</i><br/>           2) <i>Deidentified metadata refers to information such as age, gender, collection date, place of residence, travel history, disease severity and vaccination/treatment history.</i><br/>           3) <i>Raw fastq file is the collection of reads generated by NGS machines. It contains quality score information and is accepted by Sequence Read Archives (SRA) at NCBI, EBI, DDBJ and GISAID.</i></p> <p>Select all that apply:</p> <p><input type="checkbox"/> Genome sequence<br/> <input type="checkbox"/> Deidentified metadata<br/> <input type="checkbox"/> Raw fastq</p> |                                                     |                                |                          |                 |                                   |  |                                         |                                |                          |           |                                   |  |
| 4.2.2                                               | <p>For each of the above data type, who are you sharing data with?<br/>Select all that apply.</p> <table border="1"> <thead> <tr> <th>Data type</th> <th>Local/<br/>in-country</th> <th>International</th> </tr> </thead> <tbody> <tr> <td>Genome Sequence</td> <td></td> <td></td> </tr> <tr> <td>Deidentified Metadata</td> <td></td> <td></td> </tr> <tr> <td>Raw fastq</td> <td></td> <td></td> </tr> </tbody> </table> <p>Description:<br/> <ul style="list-style-type: none"> <li>- <i>Local/ in-country sharing refers to sharing with national partners/stakeholders only</i></li> <li>- <i>International sharing refers to making the data publicly available via databases such as GISAID and NCBI.</i></li> </ul> </p>                                                                                                                                 | Data type                                           | Local/<br>in-country           | International            | Genome Sequence |                                   |  | Deidentified Metadata                   |                                |                          | Raw fastq |                                   |  |
| Data type                                           | Local/<br>in-country                                                                                                                                                                                                                                                                                                                                                                                                                                                                                                                                                                                                                                                                                                                                                                                                                                              | International                                       |                                |                          |                 |                                   |  |                                         |                                |                          |           |                                   |  |
| Genome Sequence                                     |                                                                                                                                                                                                                                                                                                                                                                                                                                                                                                                                                                                                                                                                                                                                                                                                                                                                   |                                                     |                                |                          |                 |                                   |  |                                         |                                |                          |           |                                   |  |
| Deidentified Metadata                               |                                                                                                                                                                                                                                                                                                                                                                                                                                                                                                                                                                                                                                                                                                                                                                                                                                                                   |                                                     |                                |                          |                 |                                   |  |                                         |                                |                          |           |                                   |  |
| Raw fastq                                           |                                                                                                                                                                                                                                                                                                                                                                                                                                                                                                                                                                                                                                                                                                                                                                                                                                                                   |                                                     |                                |                          |                 |                                   |  |                                         |                                |                          |           |                                   |  |
| 4.2.3                                               | <p>What is the estimated <b>monthly</b> proportion of sequences shared on public databases compared to total sequenced?</p> <p>Select one:</p> <p><input type="checkbox"/> 0%<br/> <input type="checkbox"/> ≤25%<br/> <input type="checkbox"/> ≤50%<br/> <input type="checkbox"/> &lt;75%<br/> <input type="checkbox"/> &gt;75%</p>                                                                                                                                                                                                                                                                                                                                                                                                                                                                                                                               |                                                     |                                |                          |                 |                                   |  |                                         |                                |                          |           |                                   |  |
| 4.2.4                                               | <p>How often are genomic surveillance results reported back to relevant government Ministries?</p> <table border="1"> <thead> <tr> <th>Reporting results to Gov. Ministries</th> <th>Scale: 1 (Never) - 5 (Always)*</th> </tr> </thead> <tbody> <tr> <td>For routine surveillance</td> <td></td> </tr> <tr> <td>For notifiable diseases or events</td> <td></td> </tr> </tbody> </table> <p>Scale: (1=Never, 2=Rarely, 3=Sometimes, 4=Often, 5=Always)</p> <p>What genomic data is being reported to government ministries?</p> <table border="1"> <thead> <tr> <th>Genomic data reported</th> <th>Scale: 1 (Never) - 5 (Always)*</th> </tr> </thead> <tbody> <tr> <td>Sample results</td> <td></td> </tr> <tr> <td>Cluster analysis/ Phylogeny</td> <td></td> </tr> </tbody> </table> <p>Scale: (1=Never, 2=Rarely, 3=Sometimes, 4=Often, 5=Always)</p>          | Reporting results to Gov. Ministries                | Scale: 1 (Never) - 5 (Always)* | For routine surveillance |                 | For notifiable diseases or events |  | Genomic data reported                   | Scale: 1 (Never) - 5 (Always)* | Sample results           |           | Cluster analysis/ Phylogeny       |  |
| Reporting results to Gov. Ministries                | Scale: 1 (Never) - 5 (Always)*                                                                                                                                                                                                                                                                                                                                                                                                                                                                                                                                                                                                                                                                                                                                                                                                                                    |                                                     |                                |                          |                 |                                   |  |                                         |                                |                          |           |                                   |  |
| For routine surveillance                            |                                                                                                                                                                                                                                                                                                                                                                                                                                                                                                                                                                                                                                                                                                                                                                                                                                                                   |                                                     |                                |                          |                 |                                   |  |                                         |                                |                          |           |                                   |  |
| For notifiable diseases or events                   |                                                                                                                                                                                                                                                                                                                                                                                                                                                                                                                                                                                                                                                                                                                                                                                                                                                                   |                                                     |                                |                          |                 |                                   |  |                                         |                                |                          |           |                                   |  |
| Genomic data reported                               | Scale: 1 (Never) - 5 (Always)*                                                                                                                                                                                                                                                                                                                                                                                                                                                                                                                                                                                                                                                                                                                                                                                                                                    |                                                     |                                |                          |                 |                                   |  |                                         |                                |                          |           |                                   |  |
| Sample results                                      |                                                                                                                                                                                                                                                                                                                                                                                                                                                                                                                                                                                                                                                                                                                                                                                                                                                                   |                                                     |                                |                          |                 |                                   |  |                                         |                                |                          |           |                                   |  |
| Cluster analysis/ Phylogeny                         |                                                                                                                                                                                                                                                                                                                                                                                                                                                                                                                                                                                                                                                                                                                                                                                                                                                                   |                                                     |                                |                          |                 |                                   |  |                                         |                                |                          |           |                                   |  |
| 4.2.5                                               | <p>How often are results discussed in conjunction with epidemiological findings or with policymakers?</p> <table border="1"> <thead> <tr> <th>Discussion of results with epidemiological findings</th> <th>Scale: 1 (Never) - 5 (Always)*</th> </tr> </thead> <tbody> <tr> <td>For routine surveillance</td> <td></td> </tr> <tr> <td>For notifiable diseases or events</td> <td></td> </tr> </tbody> </table> <table border="1"> <thead> <tr> <th>Discussion of results with policymakers</th> <th>Scale: 1 (Never) - 5 (Always)*</th> </tr> </thead> <tbody> <tr> <td>For routine surveillance</td> <td></td> </tr> <tr> <td>For notifiable diseases or events</td> <td></td> </tr> </tbody> </table> <p>Scale: (1=Never, 2=Rarely, 3=Sometimes, 4=Often, 5=Always)</p>                                                                                         | Discussion of results with epidemiological findings | Scale: 1 (Never) - 5 (Always)* | For routine surveillance |                 | For notifiable diseases or events |  | Discussion of results with policymakers | Scale: 1 (Never) - 5 (Always)* | For routine surveillance |           | For notifiable diseases or events |  |
| Discussion of results with epidemiological findings | Scale: 1 (Never) - 5 (Always)*                                                                                                                                                                                                                                                                                                                                                                                                                                                                                                                                                                                                                                                                                                                                                                                                                                    |                                                     |                                |                          |                 |                                   |  |                                         |                                |                          |           |                                   |  |
| For routine surveillance                            |                                                                                                                                                                                                                                                                                                                                                                                                                                                                                                                                                                                                                                                                                                                                                                                                                                                                   |                                                     |                                |                          |                 |                                   |  |                                         |                                |                          |           |                                   |  |
| For notifiable diseases or events                   |                                                                                                                                                                                                                                                                                                                                                                                                                                                                                                                                                                                                                                                                                                                                                                                                                                                                   |                                                     |                                |                          |                 |                                   |  |                                         |                                |                          |           |                                   |  |
| Discussion of results with policymakers             | Scale: 1 (Never) - 5 (Always)*                                                                                                                                                                                                                                                                                                                                                                                                                                                                                                                                                                                                                                                                                                                                                                                                                                    |                                                     |                                |                          |                 |                                   |  |                                         |                                |                          |           |                                   |  |
| For routine surveillance                            |                                                                                                                                                                                                                                                                                                                                                                                                                                                                                                                                                                                                                                                                                                                                                                                                                                                                   |                                                     |                                |                          |                 |                                   |  |                                         |                                |                          |           |                                   |  |
| For notifiable diseases or events                   |                                                                                                                                                                                                                                                                                                                                                                                                                                                                                                                                                                                                                                                                                                                                                                                                                                                                   |                                                     |                                |                          |                 |                                   |  |                                         |                                |                          |           |                                   |  |

**Part 4.3: Reproducibility of Bioinformatics pipelines**

4.3.1 How is bioinformatics analysis being performed?

| Bioinformatics analysis                                           | Scale: 1 (0%) - 5 (>75%)* |
|-------------------------------------------------------------------|---------------------------|
| Using containerized workflows                                     |                           |
| Using locally installed published workflows                       |                           |
| Using tools provided by NGS manufacturer                          |                           |
| Using proprietary software                                        |                           |
| Using in-house pipeline created from individual open-source tools |                           |
| Others (pls specify):                                             |                           |

\*Scale 1 – 5: 1 = 0%, 2 = ≤25%, 3 = ≤50%, 4 = <75%, 5 = >75%

*Description:*

1) Containerized workflows refer to direct access to centrally maintained standardized bioinformatics pipelines via container platforms (e.g., Docker) directly from local computer. Popular examples include: *nf-core* and *ViralFlow*.

2) Locally installed published workflows refer to the local installation of published bioinformatics pipelines from github. It requires users to ensure installation of dependencies in order to run the pipelines on their own machines. Version control is user dependent.

3) From NGS manufacturer refers to software provided with the sequencer.

4) Proprietary software refers to paid licensed software such as *CLC genomics*.

5) In-house pipelines refer to unpublished workflows created by the laboratory to analyse sequence data and usually involves installation of several separate open access tools (e.g., *fastqc*, *samtools*, *BWA*) for each analysis step

**Section 5: Barriers and Priorities for NGS**

**Part 5.1: Main Barriers**

5.1.1 Rate the top barriers faced by laboratories for conducting adequate and effective NGS

| Contextual/Process Barriers for NGS                                         | Scale: 1 (Not a barrier) – 5 (Always a barrier)* |
|-----------------------------------------------------------------------------|--------------------------------------------------|
| Infrastructure (electricity, internet connection)                           |                                                  |
| Human Resources (availability of trained personnel)                         |                                                  |
| Samples (transportation time, quality)                                      |                                                  |
| Reagents and consumables (availability, lead time, expiry dates on arrival) |                                                  |
| Laboratory & Sequencing Equipment                                           |                                                  |
| Computing power and storage                                                 |                                                  |
| Data sharing and reporting                                                  |                                                  |
| Others (pls specify):                                                       |                                                  |

  

| Financing Barriers for NGS                  | Scale: 1 (Not a barrier) – 5 (Always a barrier)* |
|---------------------------------------------|--------------------------------------------------|
| Inadequate budget                           |                                                  |
| Lack of national plan and guidelines        |                                                  |
| Over-reliance on external funders           |                                                  |
| Lack of Industry/private-sector involvement |                                                  |
| In-country resource constraints             |                                                  |
| Low spending limits                         |                                                  |

\*(1 Not a barrier, 2 Rarely a barrier, 3 Sometimes a barrier, 4 Often a barrier, 5 Always a barrier)

**Part 5.2: Priority Areas**

5.2.1 Please identify the future priority areas where **human capacity strengthening** is required to enhance NGS capacity:

| Training Priorities                                             | Scale: 1 (Not a priority) – 5 (Essential)* |
|-----------------------------------------------------------------|--------------------------------------------|
| Sample pre-processing                                           |                                            |
| NGS library preparation and sequencing                          |                                            |
| Data processing, quality assurance and storage (Bioinformatics) |                                            |
| Data analysis                                                   |                                            |
| Data Reporting, sharing & policy making                         |                                            |
| Other (please specify)                                          |                                            |

*\*(1 Not a priority, 2 Low priority, 3 Medium priority, 4 High priority, 5 Essential)*

5.2.2 Please identify the future priority areas where **infrastructure support** is most urgently required to enhance NGS capacity:

| Laboratory & Sequencing Equipment  | Scale: 1 (Not a priority) – 5 (Essential)* |
|------------------------------------|--------------------------------------------|
| Availability                       |                                            |
| Calibration, Service & maintenance |                                            |
| Lead time                          |                                            |

  

| Computer Infrastructure for NGS     | Scale: 1 (Not a priority) – 5 (Essential)* |
|-------------------------------------|--------------------------------------------|
| Computer equipment                  |                                            |
| Computing processing power          |                                            |
| Computing memory & Storage capacity |                                            |

  

| Sequencing Reagents | Scale: 1 (Not a priority) – 5 (Essential)* |
|---------------------|--------------------------------------------|
| Availability        |                                            |
| Lead Time           |                                            |
| Cold Chain          |                                            |

  

| Other consumables (e.g. dishes, gloves, pipettes, tubes, etc.) | Scale: 1 (Not a priority) – 5 (Essential)* |
|----------------------------------------------------------------|--------------------------------------------|
| Availability                                                   |                                            |
| Lead Time                                                      |                                            |

*\*(1 Not a priority, 2 Low priority, 3 Medium priority, 4 High priority, 5 Essential)*

**Supplementary Table 5:** Binary indicators used for calculating country summary scores.

| INDICATOR NAME                            | DEFINITION                                                                                                                                                                                                            | SUMMARY SCORING                                                                                                                                                         |
|-------------------------------------------|-----------------------------------------------------------------------------------------------------------------------------------------------------------------------------------------------------------------------|-------------------------------------------------------------------------------------------------------------------------------------------------------------------------|
| NGS for unknown pathogens                 | Proportion of countries using NGS to detect <i>unknown pathogens</i>                                                                                                                                                  | 1 = Yes (for Human surveillance)<br>0 = No (for Human surveillance)                                                                                                     |
| External support                          | Proportion of countries where reliance on external support is low/ not a barrier for NGS                                                                                                                              | 1 = Likert score <4<br>0 = Likert score ≥4                                                                                                                              |
| Sufficient funding                        | Proportion of countries who perceive sufficient funding for pathogen genomic surveillance systems over the coming 5 year cycle                                                                                        | 1 = Likert score ≥4<br>0 = Likert score <4                                                                                                                              |
| Sustainable funding                       | Proportion of countries who perceive sustainable funding for genomic surveillance systems for the coming 5 year cycle                                                                                                 | 1 = Likert score ≥4<br>0 = Likert score <4                                                                                                                              |
| Strategic plan                            | Proportion of countries where a national strategic plan exists that includes pathogen genomic surveillance                                                                                                            | 1 = Yes<br>0 = No                                                                                                                                                       |
| Guidelines                                | Proportion of countries where national guidelines exist for pathogen genomic surveillance                                                                                                                             | 1 = Yes<br>0 = No                                                                                                                                                       |
| Expert panel                              | Proportion of countries where a national expert panel or technical advisory group exist to advise government interpretation/use of pathogen genomic surveillance data                                                 | 1 = Yes<br>0 = No                                                                                                                                                       |
| Equipment repair lead time                | Proportion of countries who perceive equipment repair lead time as low/ no barrier to sequencing capacity                                                                                                             | 1 = Likert score <4<br>0 = Likert score ≥4                                                                                                                              |
| Resupply time length                      | Median re-supply time between order and receipt of reagents and consumables                                                                                                                                           | 1 = <4 weeks<br>0 = ≥4 weeks                                                                                                                                            |
| Stock adequacy - reagents and consumables | Proportion of countries reporting no stock out of reagents /consumables in the past 6 months                                                                                                                          | 1 = Likert score <4<br>0 = Likert score ≥4                                                                                                                              |
| Laboratory guidelines and protocols       | Proportion of countries where laboratory guidelines and protocols exist for genomic sequencing of one or more pathogens                                                                                               | 1 = Yes<br>0 = No                                                                                                                                                       |
| Sequencing capacity                       | Median monthly pathogen sequences generated in the past year, per million population                                                                                                                                  | 1 = ≥ regional average<br>0 = < regional average                                                                                                                        |
| Sequencing utilization                    | Average monthly sequencing output relative to maximum monthly sequencing capacity for the past year                                                                                                                   | 1 = ≥75%<br>0 = < 75%                                                                                                                                                   |
| Sequencing time                           | Median estimated time required for NGS surveillance between specimen collection, sequence generation and reporting                                                                                                    | 1 = ≥ regional average<br>0 = < regional average                                                                                                                        |
| Bioinformatics capacity                   | Proportion of countries with in-country bioinformatics expertise (defined as the ability to utilize published workflows (containerized or locally installed) or in-house pipelines for >75% of genomic data analysis) | 1 = >75% sequences performed in containerized workflow or locally installed workflow or in-house pipeline<br>0 = Proprietary software or tools by manufacturer or other |
| National quality assurance mechanism      | Proportion of countries where national quality assurance mechanisms exist for governance of national laboratory quality (not specific to NGS)                                                                         | 1 = Yes<br>0 = No                                                                                                                                                       |
| Laboratory certification or accreditation | Proportion of countries where > 75% of laboratories conducting NGS have been certified or accredited by any local or internationally recognized body                                                                  | 1 = ≥75% labs certified<br>0 = < 75% labs certified                                                                                                                     |
| External quality assurance                | Proportion of countries where >75% of laboratories have participated in any proficiency testing or external quality assurance audits for NGS                                                                          | 1 = ≥75% labs participated in proficiency testing or external quality assurance<br>0 = < 75% labs participated in proficiency testing or external quality assurance     |
| Data sharing                              | Proportion of countries reporting > 75% of total sequences are shared on public databases                                                                                                                             | 1 = ≥75%<br>0 = < 75%                                                                                                                                                   |
| Engagement of policymakers                | Proportion of countries reporting regularly sharing genomic data to policymakers to inform decision making                                                                                                            | 1 = Likert score ≥4<br>0 = Likert score <4                                                                                                                              |
